1 **Title: The economical lifestyle of CPR bacteria in groundwater allows little**  
2 **preference for environmental drivers**

3 **Authors:** Narendrakumar M. Chaudhari<sup>1,2</sup>, Will A. Overholt<sup>1</sup>, Perla Abigail Figueroa-Gonzalez<sup>3</sup>,  
4 Martin Taubert<sup>1</sup>, Till L. V. Bornemann<sup>3</sup>, Alexander J. Probst<sup>3</sup>, Martin Hölzer<sup>4,5†</sup>, Manja Marz<sup>4,5,6</sup>  
5 and Kirsten Küsel<sup>1,2\*</sup>

6 **Institutions:**

7 <sup>1</sup>Aquatic Geomicrobiology, Institute of Biodiversity, Friedrich Schiller University, Jena,  
8 Germany.

9 <sup>2</sup>German Center for Integrative Biodiversity Research (iDiv) Halle-Jena-Leipzig, Leipzig,  
10 Germany.

11 <sup>3</sup>Department for Chemistry, Environmental Microbiology and Biotechnology, Group for Aquatic  
12 Microbial Ecology (GAME), University Duisburg-Essen, Essen, Germany.

13 <sup>4</sup>RNA Bioinformatics and High Throughput Analysis, Friedrich Schiller University, Jena,  
14 Germany.

15 <sup>5</sup>European Virus Bioinformatics Center, Friedrich Schiller University, Jena, Germany.

16 <sup>6</sup>FLI Leibniz Institute for Age Research, Jena, Germany.

17 <sup>†</sup>Present address: Methodology and Research Infrastructure, MF1 Bioinformatics, Robert Koch  
18 Institute, Berlin, Germany.

19 **Emails:**

20 Narendrakumar M. Chaudhari: [narendrakumar.chaudhari@uni-jena.de](mailto:narendrakumar.chaudhari@uni-jena.de)

21 Will A. Overholt: [will.overholt@uni-jena.de](mailto:will.overholt@uni-jena.de)

22 Perla Abigail Figueroa-Gonzalez: [abigail.figueroa-gonzalez@uni-due.de](mailto:abigail.figueroa-gonzalez@uni-due.de)

23 Martin Taubert: [martin.taubert@uni-jena.de](mailto:martin.taubert@uni-jena.de)

24 Till L. V. Bornemann: [till.bornemann@uni-due.de](mailto:till.bornemann@uni-due.de)

25 Alexander J. Probst: [alexander.probst@uni-due.de](mailto:alexander.probst@uni-due.de)

26 Martin Hölzer: [hoelzer.martin@gmail.com](mailto:hoelzer.martin@gmail.com)

27 Manja Marz: [manja@uni-jena.de](mailto:manja@uni-jena.de)

28 <sup>\*</sup>Kirsten Küsel: [kirsten.kuesel@uni-jena.de](mailto:kirsten.kuesel@uni-jena.de)

29 <sup>\*</sup>Corresponding author.

## 30 **Abstract**

31 The highly diverse *Cand. Patescibacteria* are predicted to have minimal biosynthetic and  
32 metabolic pathways, which hinders understanding of how their populations differentiate to  
33 environmental drivers or host organisms. Their metabolic traits to cope with oxidative stress are  
34 largely unknown. Here, we utilized genome-resolved metagenomics to investigate the adaptive  
35 genome repertoire of *Patescibacteria* in oxic and anoxic groundwaters, and to infer putative host  
36 ranges.

37 Within six groundwater wells, *Cand. Patescibacteria* was the most dominant (up to 79%) super-  
38 phylum across 32 metagenomes obtained from sequential 0.2 and 0.1  $\mu\text{m}$  filtration. Of the  
39 reconstructed 1275 metagenome-assembled genomes (MAGs), 291 high-quality MAGs were  
40 classified as *Cand. Patescibacteria*. *Cand. Paceibacteria* and *Cand. Microgenomates* were  
41 enriched exclusively in the 0.1  $\mu\text{m}$  fractions, whereas candidate division ABY1 and *Cand.*  
42 *Gracilibacteria* were enriched in the 0.2  $\mu\text{m}$  fractions. *Patescibacteria* enriched in the smaller 0.1  
43  $\mu\text{m}$  filter fractions had 22% smaller genomes, 13.4% lower replication measures, higher fraction  
44 of rod-shape determining proteins, and genomic features suggesting type IV pili mediated cell-  
45 cell attachments. Near-surface wells harbored *Patescibacteria* with higher replication rates than  
46 anoxic downstream wells characterized by longer water residence time. Except prevalence of  
47 superoxide dismutase genes in *Patescibacteria* MAGs enriched in oxic groundwaters (83%), no  
48 major metabolic or phylogenetic differences were observed based on oxygen concentrations. The  
49 most abundant *Patescibacteria* MAG in oxic groundwater encoded a nitrate transporter, nitrite  
50 reductase, and F-type ATPase, suggesting an alternative energy conservation mechanism.  
51 *Patescibacteria* consistently co-occurred with one another or with members of phyla

52 Nanoarchaeota, Bacteroidota, Nitrospirota, and Omnitrophota. However, only 8% of MAGs  
53 showed highly significant one-to-one association, mostly with Omnitrophota. Genes coding for  
54 motility and transport functions in certain Patescibacteria were highly similar to genes from other  
55 phyla (Omnitrophota, Proteobacteria and Nanoarchaeota).

56 Other than genes to cope with oxidative stress, we found little genomic evidence for niche  
57 adaptation of Patescibacteria to oxic or anoxic groundwaters. Given that we could detect specific  
58 host preference only for a few MAGs, we propose that the majority of Patescibacteria can attach  
59 to multiple hosts just long enough to loot or exchange supplies with an economic lifestyle of  
60 little preference for geochemical conditions.

## 61 **Keywords**

62 Candidate Phyla Radiation (CPR), *Cand.* Patescibacteria, Economic lifestyle, Metagenomics,  
63 Microbial ecology.

## 64 **Introduction**

65 Metagenomic sequencing of diverse environments has enabled the recovery of genomic  
66 information from a vast majority of uncultivated microbial dark matter, significantly expanding  
67 the tree of life. *Cand.* Patescibacteria is a superphylum also known as Candidate Phyla Radiation  
68 (CPR) that constitutes a major portion of this expanded tree of life [1]. Patescibacteria, initially  
69 recovered from groundwater and aquatic sediments [2,3], are now shown to inhabit a broad range  
70 of surface and subsurface habitats, such as marine water, freshwater, freshwater beach sands [4]  
71 hydrothermal vents [5], cold-water geyser [6,7], plant rhizosphere [8], alpine permafrost [9],  
72 permafrost thaw ponds [10], and many more habitats [11] including the human oral cavity [12–

73 14]. Nevertheless, they dominate the groundwater, where they comprise 20-70% of the total  
74 microbial community [15–18] along with thermokarst lakes [19] and hypersaline soda lake  
75 sediments [20].

76 Patescibacteria have small genomes characterized by predicted minimal biosynthetic and  
77 metabolic pathways, and are reported to have an anaerobic, fermentative lifestyle [21,22]. These  
78 traits may be responsible for their high abundance in nutrient-limited groundwater habitats,  
79 which are mainly anoxic. Interestingly, oxic surface soils are a major source of CPR bacteria  
80 inhabiting modern groundwater (stored within last 50 years) [23], as these organisms are easily  
81 mobilized into soil seepage water [17,24], but their metabolic traits to cope with oxidative stress  
82 are largely unknown. Divergent trends in the preference for several hydrochemical parameters or  
83 specific host preferences seem to result in the differentiation of CPR bacteria in groundwater  
84 [17]. Similarly, little species-level overlap of metagenome-assembled genomes (MAGs) across  
85 varying groundwater sites suggests that CPR communities differ based on specific environmental  
86 factors including host populations [18].

87 Most Patescibacteria cells are estimated to have ultra-small diameters ranging from 0.1  $\mu\text{m}$  to 0.3  
88  $\mu\text{m}$  [11,15,21] with few exceptions like Saccharimonadia (candidate division TM7) that may be  
89 as large as 0.7  $\mu\text{m}$  in diameter [25]. Small cell sizes of Patescibacteria accompanied by reduced  
90 genomes [3,21,22] suggest host-associated lifestyles. Indeed, specific studies on Patescibacteria  
91 isolates along with co-culture and microscopic analyses provided evidence of their symbiotic  
92 associations with other organisms e.g. with *Paramecium bursaria*, a ciliated protist in freshwater  
93 [26], or with Actinobacteria (*Actinomyces odontolyticus*, *Propionibacterium propionicus*,  
94 *Schaalia meyeri*) in the human oral cavity [12,27–29]. Similarly, CPR bacteria attach as

95 episymbionts to putative bacterial hosts through pilin-like appendages in pristine groundwater  
96 [18].

97 In contrast, single cell genomic and biophysical observations from 46 globally distributed  
98 groundwater sites did not support the prevailing view that Patescibacteria are dominated by  
99 symbionts [11]. The authors suggest that their unusual genomic features and prevalent  
100 auxotrophies may be the result of ancestral, primitive energy metabolism that relies on  
101 fermentation. Additionally, genome streamlining in free-living prokaryotes in the open ocean is a  
102 known mechanism to reduce functional redundancy and conserve energy [30]. Minimizing  
103 energy expenditure and nutrient demands has constituted a selective advantage for  
104 *Prochlorococcus* in surface waters where nutrients are scarce at the expense of versatility and  
105 competitiveness in changing conditions [31], and the same could be true for CPR bacteria  
106 dominating oligotrophic subsurface waters. Thus, there is the need to disentangle which lineages  
107 of CPR bacteria are host-dependent and which are free-living, and how much variation in terms  
108 of lifestyle, metabolism and gene content exists between those which show a preference for  
109 certain geochemical conditions.

110 In this study, we took advantage of a well-studied modern groundwater system within the  
111 Hainich Critical Zone Exploratory (CZE) located in Thuringia, Germany [32], dominated by  
112 CPR bacteria, that exhibits large environmental gradients from oxic to anoxic conditions  
113 accompanied by different well-specific microbiomes [33]. Using 291 manually curated MAGs  
114 we aimed to identify the adaptive genomic repertoire of CPR bacteria. Sequential filtration was  
115 performed to gather clues about possible physical association of ultra-small Patescibacteria with  
116 larger sized host ranges. We also inferred putative hosts for Patescibacteria based on the co-

117 occurrence patterns with other microorganisms within the transect, especially based on  
118 abundances of all the MAGs enriched in the 0.2  $\mu$ m filter fractions.

## 119 **Results**

### 120 ***Patescibacteria* represent more than 50% of all prokaryotes in Hainich groundwater**

121 *Cand.* *Patescibacteria* dominated the groundwater community representing on average more than  
122  $50 \pm 18\%$  (range 23-79%) prokaryotes across 32 metagenomes obtained from groundwater of six  
123 wells that was sequentially filtered through 0.2  $\mu$ m and 0.1  $\mu$ m filters, based on the proportion of  
124 the quality-controlled metagenomic reads mapped to the 16S rRNA database (SILVA SSU  
125 rRNA Ref NR99) [34]. Three major classes within the phylum were detected: *Cand.*  
126 *Parcubacteria/Paceibacteria* ( $36.2 \pm 17.1\%$ , range 13-65.7%), *Cand.* *Microgenomatia* ( $7.2 \pm$   
127  $3.1\%$ , range 2-12%) and candidate division ABY1 ( $3.2 \pm 1.4\%$ , range 1.1-5.1%). *Patescibacteria*  
128 were found to be highly abundant in both filter fractions. Their relative abundances were  
129 significantly higher (two-proportions z-test, p-value  $1.16e-05$ ) in the 0.1  $\mu$ m filter fractions ( $67.6$   
130  $\pm 9.1\%$ , range 54.1-78.5%) than in the 0.2  $\mu$ m filter fractions ( $35.5 \pm 8.9\%$ , range 23.1-51.1%),  
131 (Figure 1).

132 Within the detected *Patescibacteria*, site specific and filter size preferences were observed  
133 (Figure 2). The shallowest well at the top of the hillslope, H14, showed a relatively higher  
134 percentage of *Saccharimondales* compared to other wells. *Candidatus* *Staskwiczbacteria* showed  
135 preference for wells H14 and H43 (characterized by hypoxic/ anoxic environments with low  
136 nitrate), and *Candidatus* *Wolfbacteria*, UBA9983, and *Candidatus* *Liptonbacteria* for well H52  
137 (characterized by anoxic environment and longest water residence time). *Candidatus*

138 Magasanikbacteria and UBA9983 showed preference for 0.2  $\mu\text{m}$  filter fractions of all the wells,  
139 whereas *Candidatus* Woesebacteria was enriched in all the 0.1  $\mu\text{m}$  filter fractions.

140 **Dominance of Patescibacteria in Hainich groundwater communities enabled recovery of**  
141 **hundreds of high quality MAGs**

142 Metagenomic assembly and binning of all individual groundwater samples ( $n = 32$ ) yielded a  
143 total of 1275 non-redundant manually refined MAGs from various bacterial and archaeal species.  
144 Among these MAGs, 584 MAGs were classified as *Cand.* Patescibacteria by GTDB-Tk and 291  
145 of them were classified as CPR with high confidence score by a random forest classifier within  
146 Anvi'o v6.1 [35,36], trained with a set of CPR specific single copy genes extracted from  
147 previously published CPR genomes [15,37] (Additional file 1). Most of these 291 MAGs  
148 belonged to the classes: *Cand.* Paceibacteria (163 MAGs) followed by candidate division ABY1  
149 (49 MAGs), and *Cand.* Microgenomatia (46 MAGs) (Figure 3, A). The details about all the  
150 Patescibacteria MAGs are provided in Additional file 2. The phylogenetic tree constructed from  
151 the multiple alignment of 68 core protein sequences confirmed the taxonomic placement of  
152 Patescibacteria MAGs (Figure 3, B).

153 **Differences in the genome sizes of Patescibacteria based on cell size enrichment**

154 We identified 110 Patescibacteria MAGs enriched in the 0.1  $\mu\text{m}$  filter fractions based on their  
155 average *rpoB* gene-count-normalized coverage (See Methods) being 5-fold higher than in the 0.2  
156  $\mu\text{m}$  filter fractions. Of these, 82 MAGs were further classified as *Cand.* Paceibacteria, and 23 as  
157 *Cand.* Microgenomatia. Both classes were absent in the MAGs enriched in 0.2  $\mu\text{m}$  filter  
158 fractions. Similarly, 33 Patescibacteria MAGs were enriched 5-fold more in the 0.2  $\mu\text{m}$  filter  
159 fractions, with 22 of those belonging to the candidate division ABY1, and 5 to *Cand.*

160 Gracilibacteria. Again, none of the genomes classified in these two classes were enriched in the  
161 0.1  $\mu\text{m}$  filter fractions.

162 The average genome size of all Patescibacteria MAGs enriched in the 0.1  $\mu\text{m}$  filter fractions  
163 ( $688.7 \pm 139.4$  kb) was significantly smaller (Dunn's test,  $p = 1.02\text{e-}06$ ) than that of the  
164 Patescibacteria MAGs enriched in the 0.2  $\mu\text{m}$  filter fractions ( $883.1 \pm 204.3$  kb), (Figure 4, A).  
165 There was no significant difference in the genome completeness and contamination values  
166 between the two groups.

167 When we analyzed the gene compositions of the two sets of Patescibacteria genomes, the genes  
168 encoding type-IV pilus assembly proteins (PilC, PilM, PilO) were significantly overrepresented  
169 (two-proportions z-test,  $p = 1.4\text{e-}04$ ) in Patescibacteria enriched in the 0.1  $\mu\text{m}$  filter fractions  
170 (~88% of these genomes) as compared to those from the 0.2  $\mu\text{m}$  filter fractions (~64% of these  
171 genomes). Similarly, genes encoding cell division proteins FtsW and FtsI were present in 93%  
172 and 36% of the Patescibacteria MAGs enriched in 0.1  $\mu\text{m}$  filter fractions, respectively. In  
173 comparison, the same genes were present in only 70% and 3% MAGs enriched in the 0.2  $\mu\text{m}$   
174 filter fractions (two-proportions z-test,  $p = 6.2\text{e-}04$  and  $4.7\text{e-}04$ ). The gene encoding for the rod-  
175 shape determining protein (MreB) was also more likely to be found in Patescibacteria MAGs  
176 enriched in the 0.1  $\mu\text{m}$  filter fraction (95% in the 0.1  $\mu\text{m}$ -enriched vs 75% in the 0.2  $\mu\text{m}$ -  
177 enriched, two-proportions z-test,  $p = 1.8\text{e-}03$ ). Additionally, genes involved in colanic acid  
178 biosynthesis (*wcaH* and *wcaF*) were uniquely present in ~10% of the Patescibacteria enriched in  
179 the 0.1  $\mu\text{m}$  filter fractions.

180 Conversely, the L-lactate dehydrogenase gene was detected in 12% of the MAGs enriched in the  
181 0.2  $\mu\text{m}$  filter fractions and was entirely absent in the 0.1  $\mu\text{m}$ -enriched MAGs. A similar pattern



182 was found for the tryptophan synthase genes, *trpA* and *trpB*, which were detected in 15% and  
183 18% of the MAGs enriched in the 0.2  $\mu\text{m}$  filter fractions, but absent in Patescibacteria MAGs  
184 enriched in the 0.1  $\mu\text{m}$  filter fractions.

### 185 **Growth dynamics of Patescibacteria using *in situ* measure of replication**

186 Patescibacteria MAGs had comparatively higher estimated growth measures (GRiD values) in  
187 the near surface wells of the groundwater transect (wells H14 and H32), in comparison to the  
188 downstream wells (Figure 5, A). Specifically, these Patescibacteria showed significantly higher  
189 GRiD values at well H14 as compared to the downstream wells H41 and H43, and significantly  
190 higher GRiD values at well H32 as compared to all other wells present downstream. Notably, the  
191 wells with highest mean GRiD values for Patescibacteria were also the wells with lowest number  
192 of Patescibacteria MAGs. (Additional file 4, Figure S1).

193 The GRiD values were significantly higher (Welch Two Sample t-test,  $p = 8.73\text{e-}07$ ) in  
194 Patescibacteria MAGs enriched in 0.2  $\mu\text{m}$  filter fractions ( $1.40 \pm 0.27$ ) as compared to  
195 Patescibacteria MAGs enriched in the 0.1  $\mu\text{m}$  filter fractions ( $1.25 \pm 0.029$ ). When we compared  
196 the GRiD values of individual classes of Patescibacteria between 0.1 and 0.2  $\mu\text{m}$  filter fractions,  
197 only MAGs from class Paceibacteria showed significantly higher GRiD values in the 0.2  $\mu\text{m}$   
198 filter fractions (Welch Two Sample t-test,  $p = 6.14\text{e-}03$ , Figure 5, B).

### 199 **Limited metabolic and biosynthetic capabilities in Patescibacteria**

200 Metabolic reconstructions based on KEGG modules revealed that the metabolic repertoire of the  
201 analyzed Patescibacteria genomes did not show a clear separation by their taxonomy (Figure 6)  
202 nor followed a particular pattern in oxic and anoxic wells (Additional file 5, Figure S2). All

203 Patescibacteria MAGs lacked central energy metabolism and biosynthetic pathways for most  
204 amino acids and vitamins. The tri-carboxylic acid (TCA) cycle was missing in 81.8% of the  
205 Patescibacteria MAGs and was incomplete for the remaining 18.2% of the MAGs. Glycolysis  
206 was incomplete in all MAGs, pentose phosphate pathway (PPP) was incomplete in 92% of the  
207 MAGs, and reductive PPP was absent in 97% of the MAGs. Biosynthesis pathways for most of  
208 the amino acids (except serine, glycine and sometimes asparagine) and vitamins (except  
209 cobalamin and thiamin) were missing in most of the Patescibacteria MAGs. In addition, electron  
210 transport chain complexes (I-IV) were not identified, with exception of gene encoding for the F-  
211 Type ATPase (from ETC complex V) in 59.7% of the Patescibacteria.

212 However, Patescibacteria possessed some notable genes, namely those coding for copper  
213 transporter (*copA*) and cobalt transporter (*corA*) that are usually found in pathogenic bacteria  
214 [38,39]. Also, carbohydrate active enzymes (CAZy) responsible for degradation of starch (11%  
215 MAGs), polyphenolics (25% MAGs) and chitin (11% MAGs) were observed. At least 13% of  
216 the MAGs had more than one type of CAZy. Patescibacteria also encoded genes for small chain  
217 fatty acids (SCFA) and alcohol conversion functions e.g. D-lactate dehydrogenase (25% MAGs),  
218 L-lactate dehydrogenase (4% MAGs), and conversion of pyruvate to Acetyl-CoA (K00174, 14%  
219 MAGs). Acetate kinase was found in only 6% of the Patescibacteria MAGs. A mutually  
220 exclusive presence of D- and L-lactate dehydrogenases was observed.

### 221 **Genomic signs of adaptive response of Patescibacteria to oxic and anoxic conditions**

222 We classified 134 Patescibacteria MAGs as 5-fold enriched in oxic wells (H32, H41 and H51)  
223 and 64 Patescibacteria MAGs as 5-fold enriched in anoxic wells (H14, H43 and H52). No  
224 taxonomic preference for oxic or anoxic conditions was observed. Patescibacteria MAGs

225 enriched in oxic sites showed some unique features with respect to their ability to resist oxidative  
226 stress. We found that superoxide dismutase genes (at least one of the *sodA*, *sodB*, *sodC*, *sodF*,  
227 *sodM*, *sodN* or *chrC* genes) were encoded by significantly higher proportion (82.8%) of the  
228 Patescibacteria MAGs enriched in oxic wells than in anoxic wells (65.6%) (two-proportions z-  
229 test,  $p = 8.8e-03$ ), but there was no evidence for other stress regulator genes (*oxyR*, *soxR*, *soxS*,  
230 *rpoS*). There were no relevant metabolic pathways or genes specific to the 64 Patescibacteria  
231 MAGs enriched in anoxic wells (Additional file 5, Figure S2).

232 Correlation of the genomic coverages (relative abundances) of the Patescibacteria MAGs  
233 enriched in oxic wells with the dissolved oxygen concentrations revealed highly significant  
234 positive correlations for 28 MAGs (Additional file 6). Most of these MAGs belonged to class  
235 *Cand. Paceibacteria* (family UBA1539/*Yonathbacteraceae*) and genus GWC2-37-13 from order  
236 UBA1406/*Roizmanbacterales*. Most of these MAGs (82%) carried superoxide dismutase gene  
237 (K04564) essential for protection against free superoxide radicals in oxic environments.

238 We chose the most abundant, high quality Patescibacteria MAGs from oxic well H41 (H41-  
239 bin288, 0.1  $\mu\text{m}$  filter fraction, relative abundance =  $0.75\% \pm 0.15$ ) and anoxic well H52 (H52-  
240 bin095, 0.1  $\mu\text{m}$  filter fraction, relative abundance =  $2.28\% \pm 0.37$ ) as model organisms to  
241 illustrate the commonalities and divergences in their genomes (Figure 7). We also included the  
242 second most abundant Patescibacteria MAG from the same oxic well H41 (H41-bin049, 0.1  $\mu\text{m}$   
243 filter fraction, relative abundance =  $0.41\% \pm 0.02$ ) from the same taxonomic family as the anoxic  
244 representative. This was done to rule out the genomic differences due to the relatively distant  
245 evolutionary history of the first pair (H41-bin288 and H52-bin095). The representative MAGs  
246 H41-bin288 and H41-bin049 from the oxic well H41 showed positive correlations with oxygen

247 (R = 0.88, p = 2.0e-02 and R = 0.75, n.s., respectively), while the representative MAG from  
248 anoxic well (H52-bin095) showed a negative correlation (R = -0.43, n.s.).

249 Features specific to both representative genomes from oxic well H41 were genes coding for F-  
250 type H<sup>+</sup>-transporting ATPase (subunit a, b, c,  $\alpha$ ,  $\beta$  and  $\gamma$ ), NitT/TauT family transporter (involved  
251 in transport of inorganic ions like nitrate, sulfonate, and bicarbonate), and nitrite reductase (*nirK*  
252 involved in conversion of nitrite to nitric oxide). On the other hand, genes related to sugar  
253 sensing and multiple sugar transport systems (ABC.MS.S), and lactate dehydrogenase  
254 (fermentation) were specific to the anoxic representative. Common genes or functions were  
255 found for all three representative genomes, e.g. genes encoding type IV pilus assembly proteins  
256 (PilB, PilC, PilM, and PilO) as well as competence proteins (ComEC, ComFC), useful for DNA  
257 uptake from exogenous sources, superoxide dismutase (SOD2) for protection against superoxide  
258 radicals, transporters of metal ions like zinc, copper, calcium, nickel. We also identified genes  
259 encoding for rod-shape determining proteins, like RodA with additionally related genes encoding  
260 for proteins like MreB and MreC in the anoxic representative.

### 261 **Co-occurrence patterns of Patescibacteria with other microbial species**

262 A co-occurrence network generated using metagenomic abundances of MAGs revealed that  
263 many species of Patescibacteria were consistently co-occurring with one another, as well as with  
264 species of other bacteria and archaea (Figure 8). The average normalized genome coverages for  
265 all the studied MAGs across both filter fractions of all the wells are provided in Additional file 7.  
266 The most common one-to-one associations were observed with MAGs from the phyla  
267 Nanoarchaeota (mostly order Pacearchaeales), Bacteroidota, MBNT15, and Bdellovibrionota. A  
268 small isolated cluster within the network showed indirect but close associations of

269 Patescibacteria with multiple members of the phylum Nitrospirota (genus RGB.16.64.22), and  
270 phylum Omnitrophota (Figure 8).

271 Under the assumption that Patescibacteria were physically associated with larger host cells, we  
272 simplified our co-occurrence network to further refine the associations in the 0.2  $\mu\text{m}$  filter  
273 fractions (using the 5-fold coverage cut-off as compared to 0.1  $\mu\text{m}$  filter fractions). This follow-  
274 up co-occurrence network showed one-to-one associations of MAGs of the phylum  
275 Omnitrophota (class koll11) with MAGs from Patescibacteria (each one from the classes  
276 Paceibacteria, Microgenomatia, and candidate division ABY1). One of the MAGs from class  
277 Paceibacteria showed association with a Proteobacteria MAG (order Rickettsiales), while a  
278 MAG from candidate division ABY1 showed direct connections with two Bacteroidota MAGs.  
279 Another MAG from class Gracilibacteria showed direct connections with 5 Nitrospirota MAGs  
280 from the same genus UBA1546 (Figure 8). The sequence coverages of these highlighted genome  
281 pairs or clusters across the metagenomes are compared in Additional file 8, Figure S3 and  
282 Additional file 9, Figure S4. Two Actinobacteria MAGs belonging to the species  
283 *Aurantimicrobium* sp003194085 also showed associations with Patescibacteria. The first  
284 *Aurantimicrobium* interacted with a Patescibacteria (*Cand. Paceibacteria*) MAG, and the second  
285 with multiple Patescibacteria (2 *Cand. Paceibacteria*, 2 *Cand. Gracilibacteria* and 3 candidate  
286 division ABY1) MAGs.

287 When we searched for sequence similarity of all gene open reading frames (ORFs) from all  
288 Patescibacteria MAGs to ORFs from all other bacterial and archaeal MAGs in the present study  
289 using blastn [40], we found various ORFs from other taxa highly similar to Patescibacteria ORFs  
290 (95% sequence identity covering 85% length of the query and hit sequences). The most ORFs  
291 that matched were between members of genus UBA10092 of Patescibacteria (class

292 Paceibacteria) and two members of the family UBA12090 of Omnitrophota (34 and 16 ORFs,  
293 respectively). They included genes encoding for twitching motility protein PilT (K02669), P-  
294 type Cu<sup>+</sup> transporter (K17686) and lipopolysaccharide export system permease protein  
295 (K11720). Between members of genus UBA11707 of Patescibacteria (class ABY1) and genus  
296 UBA1573 of Proteobacteria (family Micavibrionaceae), 14 such ORFs, including gene encoding  
297 for ABC-2 type transport system ATP-binding protein (K01990), were observed. Thirteen such  
298 ORFs, including gene for ABC-2 type transport system permease protein (K01992), were  
299 observed between members of the family Zambryskibacteraceae of class Paceibacteria and genus  
300 ASMP01 of Nanoarchaeota.

301 To have an idea about the temporal co-occurrence patterns of other groundwater microbes with  
302 Patescibacteria, we additionally utilized time-series data based on 16S rRNA gene amplicon  
303 sequencing from the same groundwater transect from three wells (H41, H43 and H52) measured  
304 over more than six years [41]. We observed that Patescibacteria co-occurred mostly with  
305 members of phyla Proteobacteria (mostly order Burkholderiales) and Nitrospirota (order  
306 Thermodesulfobionia), in the well H41; Verrucomicrobiota, in the well H43 and  
307 Planctomycetota (mostly genus *Brocadia*) in the well H52. Similarly, a Patescibacteria MAG  
308 was identified to co-occur with multiple Thermodesulfobionia MAGs belonging to the  
309 phylum Nitrospirota in this study.

## 310 **Discussion**

311 Our comprehensive metagenomic analyses revealed that modern pristine groundwater of the  
312 Hainich CZE is clearly dominated by *Cand.* Patescibacteria with an average relative abundance  
313 of 50% across all wells and a maximum of 79% in the 0.1 µm filter fraction. Compared to other

314 groundwater communities dominated by CPR bacteria ranging from 2-28% [16], 3-40% [18], 10-  
315 28% [7] and 36-65% [15], the exceptionally high abundance of CPR bacteria discovered in this  
316 study is distributed over distinct geochemical zones spanning oxic and anoxic conditions [17,33].  
317 Although the spatial distribution patterns of the different *Cand.* Patescibacteria taxa (Figure 2)  
318 were less pronounced than those observed in other bacteria in groundwater of the Hainich CZE  
319 [33,41], and despite their streamlined genomes, we could highlight certain environmental  
320 preferences of the *Cand.* Patescibacteria. Access to 587 manually curated MAGs of *Cand.*  
321 Patescibacteria, assigned to different filter fractions, allowed us to shed some light on genomic  
322 characteristics linked to their cell size and a putative free living or host attached lifestyle.

323 Patescibacteria have been described mostly in anoxic or hypoxic environments [42,43]. Our data  
324 show no major metabolic or taxonomic differences in Patescibacteria enriched in oxic and anoxic  
325 groundwater wells. Significantly higher proportion of superoxide dismutase genes in  
326 Patescibacteria MAGs enriched in oxic groundwater wells compared to those in anoxic wells is  
327 an example of spatial differentiation that might be due to an environmental selection mechanism,  
328 as these enriched species have an advantage to withstand the presence of oxygen radicals when  
329 exposed to high O<sub>2</sub> concentrations. More than 80% of the Patescibacteria MAGs enriched in oxic  
330 wells could potentially resist superoxide radicals, and more than 20% showed a positive  
331 correlation to oxygen concentrations, in particular those belonging to class *Cand.* Paceibacteria  
332 (family UBA1539/*Yonathbacteraceae*) and to order UBA1406/*Roizmanbacterales*. But even  
333 closely related Patescibacteria species showed different preferences for oxygen concentrations in  
334 terms of metabolic pathways (Figure 7).

335 The permanently high O<sub>2</sub> concentration in well H32 ( $2.23 \pm 0.56$  mg/L) and especially in well  
336 H41 ( $4.83 \pm 1.7$  mg/L) [41,44], did not lead to enrichment of groundwater Patescibacteria MAGs

337 with genetic traits of energy harvesting mechanisms through aerobic respiration. Exposure to  
338 oxygen is not exceptional for *Cand. Patescibacteria*, as oxic soils are the main source for their  
339 vertical translocation into shallow groundwater [17,24]. *Cand. Patescibacteria* represent only  
340 0.55% of the total bacterial soil community in the preferential forest surface-recharge area of the  
341 Hainich CZE (Herrmann *et al.* 2021, unpublished observations). Despite this low abundance,  
342 these ultra-small organisms are readily mobilized from soil, especially during winter months  
343 when ionic strength of the seepage is very low (Herrmann *et al.* 2021, unpublished observations),  
344 and as such constitute the largest fraction of taxa shared between seepage and shallow  
345 groundwater [17].

346 The most abundant *Patescibacteria* MAG from oxic well H41 (H41-bin288) had genes that  
347 encode for nitrite transport and its subsequent reduction into nitric oxide involving  
348 ferricytochrome c. Also, this genome possessed a gene for F-Type ATPase to generate energy by  
349 ATP formation and it did not encode genes for fermentation (L- or D-lactate dehydrogenase).  
350 This collectively suggests the possibility of an alternative anaerobic respiration mechanism in  
351 this particular genome. Despite the low *in situ* concentrations of nitrite, it might be alternatively  
352 provided by the nitrification process. This relates to the fact that well H41 is characterized as a  
353 nitrification hotspot with measured rates of  $0.48 \pm 0.09$  and  $0.64 \pm 0.39$  nmol NO<sub>x</sub> liter<sup>-1</sup> h<sup>-1</sup> [45]  
354 and to the high relative abundances of *Nitrospira* on the metagenome level and *Thaumarchaeota*  
355 on the metatranscriptome level [46]. Presence of genes coding for multiple subunits of F-Type  
356 (H<sup>+</sup> transporting) ATPase in this genome confirms the existence of supplementary ATP synthesis  
357 machinery, which are commonly observed in aerobic bacteria [47]. Similarly, notable features  
358 specific to both representative genomes from oxic well H41 included genes involved in the  
359 transport of inorganic ions like nitrate, sulfonate, and bicarbonate.



360 The almost complete absence of the aerobic respiration machinery i.e. the electron transport  
361 chain complexes, terminal oxidases / electron acceptors, and gene products associated with the  
362 TCA cycle, along with widespread presence of L- or D-lactate dehydrogenases confirms the  
363 previously postulated fermentative lifestyles of Patescibacteria [11,15,48] in members of the  
364 three lineages OD1 (Parcubacteria), OP11 (Microgenomates), and BD1-5 (Gracilibacteria).  
365 Parcubacteria were proposed to produce acetate, ethanol, lactate, and hydrogen as fermentation  
366 products based on metagenomic and proteomic analysis [3,15,48]. Presence of L- or D-lactate  
367 dehydrogenase genes in one third of the Patescibacteria MAGs indicates specificity for  
368 fermentation substrates. In one tenth of the MAGs enriched in 0.1  $\mu\text{m}$  filter fractions, specificity  
369 for L-lactate could be observed based on the exclusive presence of L-lactate dehydrogenase  
370 genes. Presence of multiple carbohydrate active enzymes (CAZy) in many Patescibacteria  
371 suggests their potential for degradation of multiple complex compounds like starch, chitin, and  
372 polyphenolics.

373 The spatial differentiation of *Cand.* Patescibacteria could also be indirectly caused by the  
374 preference of a putative host organism for certain environmental conditions. The oxic, nitrate-  
375 rich (15.71 mg/L) groundwater of well H41 was dominated by Nitrospirota MAGs, and 5 of  
376 them co-occurred with a single Patescibacteria MAG (H52-bin081\_1, *Cand.* Gracilibacteria) and  
377 had similar abundance patterns (Additional file 9, Figure S4). As some Nitrospirota MAGs (n =  
378 51) were enriched exclusively in oxic wells, their preference might have determined the  
379 distribution pattern of putative CPR episymbionts. Nitrospirota species were also found to be  
380 consistently co-occurring with Patescibacteria in some of the studied wells based on OTU  
381 abundances from 16S rRNA gene amplicon sequencing data collected over 6.5 years [41] as well

382 as MAG abundances from this study across the groundwater transect. At the minimum, these  
383 observations suggest common niche preferences between some members of these two phyla.

384 To elucidate other possible associations of Patescibacteria with other prokaryotes, we utilized  
385 above mentioned time-series data that revealed consistent co-occurrence of Patescibacteria OTUs  
386 with OTUs from Proteobacteria, Verrucomicrobiota, and Planctomycetota in addition to OTUs  
387 from Nitrospirota [41]. When we looked into the genomic characteristics of all Patescibacteria  
388 and all other MAGs, we found various ORFs from other taxa highly similar with Patescibacteria,  
389 between members of (i) class Paceibacteria and family Omnitrophota, (ii) class ABY1 and  
390 family Micavibrionaceae, and (iii) family Zambryskibacteraceae of class Paceibacteria and genus  
391 ASMP01 of Nanoarchaeota, suggesting probable acquisition of motility and transport functions  
392 from other bacteria or archaea.

393 Network analysis based on abundances of all MAGs of both filter fractions revealed that the  
394 members of the phyla Bacteroidota, MBNT15, and Bdellovibrionota along with members of  
395 phyla Nitrospirota and Omnitrophota had direct specific connections with some Patescibacteria.  
396 Furthermore, we restricted the network analysis only to MAGs enriched on the 0.2  $\mu$ m filter  
397 fractions (57 Patescibacteria and 423 other MAGs) in order to identify Patescibacteria that would  
398 be potentially attached to other larger host cells. This narrowed-down analysis showed  
399 interactions of Patescibacteria with few specific MAGs of the phyla Bacteroidota, Nitrospirota,  
400 Omnitrophota, and Actinobacteria. Our co-occurrence analysis did not reveal direct connections  
401 of Actinobacteria MAGs with any of the Saccharibacteria, although Actinobacteria are reported  
402 as host for Saccharibacteria (TM7) in human oral cavity [12,27,29]. However, direct network  
403 connections of *Aurantimicrobium* species, members of the phylum Actinobacteria with multiple

404 other Patescibacteria MAGs from classes Paceibacteria, Gracilibacteria, and candidate division  
405 ABY1 hint towards possible host-symbiont relationships in these particular pairs.

406 Direct one-to-one connections with members of other phyla were found in only 5 out of 57  
407 (8.77%) Patescibacteria MAGs enriched in 0.2  $\mu\text{m}$  filter fractions, suggesting that the majority of  
408 groundwater Patescibacteria of the Hainich CZE is not specifically associated with one single  
409 host, but associations with multiple hosts cannot be ruled out. The attachments between cells are  
410 often fragile and may be partly or completely disrupted during filtration and sample processing  
411 steps, and hence are difficult to track using sequential filtration. An even lower percentage of  
412 associations (<1.5%) based on potentially co-sorted SAGs containing DNA from heterogeneous  
413 sources was reported from Beam *et al.* 2020 [11].

414 On average, Patescibacteria enriched in 0.1  $\mu\text{m}$  filter fractions had 22% smaller genome size  
415 than those enriched in 0.2  $\mu\text{m}$  filter fractions, and it has been previously shown that smaller cell  
416 size is linked to genome reduction [49,50]. This genome size difference might be due to  
417 differences in average cell sizes of *Cand.* Paceibacteria and *Cand.* Microgenomatia that were  
418 preferentially enriched within 0.1  $\mu\text{m}$  filter fractions; and candidate division ABY1, and *Cand.*  
419 Gracilibacteria that were preferentially enriched within the 0.2  $\mu\text{m}$  filter fractions. Smaller  
420 genomes in tiny CPRs might be the result of genome streamlining leading to lack of complex  
421 energy metabolism and biosynthetic capabilities which makes them rely on other cells through  
422 cell-cell attachment.

423 We found Type IV pilus assembly proteins in a higher proportion of Patescibacteria enriched in  
424 0.1  $\mu\text{m}$  filter fractions. These proteins are responsible for formation of pilin-like appendages that  
425 are involved in a variety of functions like adherence to host cells, locomotion, DNA uptake as

426 well as protein secretion in bacteria [51], which would support physical association with other  
427 microbes. Type IV pili (T4P) are essential for virulence of some Gram-negative pathogenic  
428 bacteria [52] and also found in Gram-positive bacteria with a different pilus assembly  
429 mechanism involving a sortase [53]. Pili like appendages were microscopically shown to form  
430 surface attachment of CPR bacteria with other (host) large cells [18]. The symbiotic association  
431 of TM7i (*Cand. Saccharibacteria*) with its host *Leucobacter aridocollis* J1, mediated by T4P was  
432 identified in a co-culture experiment [54]. As pilus mediated attachments are often fragile, small  
433 Patescibacteria cells passing through the 0.2  $\mu\text{m}$  filters do not necessarily indicate lack of cell-  
434 cell attachment with larger bacterial cells. Many of these ultra-small Patescibacteria appear to  
435 have a rod-shaped morphology, as genes encoding the rod shape-determining protein (MreB)  
436 were found in a higher proportion of MAGs enriched in 0.1  $\mu\text{m}$  filter fractions. The recent  
437 reconstruction of the last bacterial common ancestor (LBCA) genome of CPR lineage suggests a  
438 rod-shaped morphology [55]. However, most of the reported morphologies for the  
439 Patescibacteria are cocci [12,18,21]. Although we cannot rule out that some of the larger rod-  
440 shaped Patescibacteria could still pass through the 0.2  $\mu\text{m}$  filter pores, this would not explain the  
441 enrichment in the 0.1  $\mu\text{m}$  filter fractions. More direct microscopic visualization is needed to  
442 verify the morphology of these ultra-small Patescibacteria.

443 We found higher growth rates of Patescibacteria in near-surface wells (H14, H32) of the  
444 groundwater transect than in the ones more downstream. Growth of CPR bacteria is stimulated  
445 after attachment to host-cells [18]. As cell-cell aggregations might be more prone to dispersal  
446 limitations in a dense rock matrix, surface-near wells could have higher probabilities of host  
447 interactions. But our co-occurrence analysis did not reveal direct connections of CPR MAGs  
448 with higher growth rates with other MAGs.

449 Groundwater of the very shallow well H14, located uphill of the transect, shows a fast response  
450 to weather events [56], and is characterized by both the highest bacterial diversity and the  
451 presence of well-known surface heterotrophs; whereas core groundwater species dominated  
452 groundwater microbiomes in the downstream direction [33]. This well, along with the other near-  
453 surface well (H32) showed the lowest relative abundances of Patescibacteria and of  
454 Patescibacteria MAGs, although those that were detected had higher expected replication rates  
455 on average. A possible explanation for this pattern is that surface exported members were  
456 replicating within the soil before being flushed into the groundwater. Other, more successful  
457 groundwater CPR groups may have slower growth and replication rates within the transect due to  
458 much lower microbial cell densities and less available organic carbon. Indeed, some taxa such as  
459 those belonging to *Cand. Saccharimonadia*, which had among the highest growth rates, did not  
460 flourish within other wells of the groundwater transect. We hypothesize that they might be more  
461 adapted to soil habitats, which was also observed in previous studies [17].

462 The predominance of particular CPR species in oxic (H41) and anoxic (H52) wells appears to be  
463 the result of environmental preference or exploitation of other organisms for cellular  
464 requirements in the nutrient deficient groundwater. Some potential hosts supporting an  
465 episymbiotic lifestyle could be identified. The environmental preference of some of these hosts,  
466 e.g. Nitrospirota for oxygen and nitrogen in well H41, would explain the predominance of their  
467 potential Patescibacteria episymbiont in H41, with an estimated episymbiont-to-host ratio of  
468 3.6:1 based on coverages of Patescibacteria and Nitrospirota MAGs in total coverage of all  
469 binned genomes. But the vast majority of the ultra-small Patescibacteria in the groundwater  
470 appears to be free-living, self-sufficient with their minimal genomes [11,42], adapted to  
471 oligotrophic conditions with low growth rates, and equipped with genes to cope with oxidative

472 stress only if needed. We found evidence that the majority has the capability to attach to other  
473 cells, which appears to also include other Patescibacteria, and this attachment might be not very  
474 specific or for longer time periods, just long enough to loot or exchange supplies.

## 475 **Conclusions**

476 The Candidate Phyla Radiation represent the largest phylogenetic diversity within the bacterial  
477 domain, which has not been reflected in the metabolic versatility of genomic representatives  
478 studied to date. Here we leveraged a well characterized aquifer transect, that is dominated by  
479 members of the CPR and spans large biogeochemical gradients, to explicitly explore genomic  
480 adaptations to environmental conditions. The most significant and surprising result was the high  
481 level of similarity in predicted metabolic functions and expected lifestyles that spanned large  
482 redox gradients from fully oxic to completely anoxic groundwater, both within the larger CPR  
483 clade as well as at finer phylogenetic resolutions. One noteworthy exception was a differential  
484 abundance in superoxide dismutase, a potentially useful indicator of oxygen exposure in CPR  
485 genomes recovered from other environments or already deposited to sequence databases. Due to  
486 a suspected dependence on other bacterial hosts, we searched among >1200 constructed MAGs  
487 and a larger amplicon dataset for potential partners, finding that only 8% of CPR MAGs  
488 exhibited significant one-to-one relationships. Therefore, we propose that most members of the  
489 CPR form non-specific associations, attaching to multiple hosts to supplement their energetic  
490 demands within oligotrophic groundwaters.

## 491 **Methods and Materials**

### 492 **Groundwater sampling, DNA extraction and sequencing**

493 Samples were collected from a groundwater transect system spanning through a ~6 km long zone  
494 including forest, pasture and agricultural land within the Hainich Critical Zone Exploratory  
495 (CZE) located in Thuringia, Germany. The Hainich CZE was established and extensively studied  
496 by Collaborative Research Center AquaDiva [32]. The groundwater was collected from 6 wells  
497 (H14, H41, H43, H51, H52) in January 2019 and (H32) in November 2018 spanning various  
498 zones of the transect. For each well, on average  $61.3 \pm 35.4$  liters of groundwater was filtered  
499 through 0.2  $\mu\text{m}$  filters (Omnipore Hydrophilic PTFE membrane, Merck Chemicals GmbH)  
500 followed by 0.1  $\mu\text{m}$  filters in triplicates (except for well H32 where there were only two  
501 replicates out of which one from the November 2018 sampling campaign was used as biological  
502 replicate). All the 32 filter fractions were immediately frozen and stored under  $-80^{\circ}\text{C}$ . The DNA  
503 was extracted using a phenol/chloroform protocol, the libraries generated with an NEBNext  
504 Ultra FS DNA preparation kit, and sequenced on an Illumina NextSeq 500 system with paired-  
505 end library ( $2 \times 150$  bp).

506 On an average  $9.8 \pm 1.15$  Gb of raw DNA sequence data were obtained from each of the 32 filter  
507 fractions. Of which,  $86.12 \pm 0.57$  % of the reads were of very high quality (at least quality score  
508 Q40). Subsequent quality control steps like adapter trimming, PhiX detection and removal using  
509 BBDuk (bbtools version 37.09, written by Brian Bushnell, last modified March 30, 2017) further  
510 improved the quality of the reads. These high-quality reads were then used for metagenomic  
511 assembly and followed by genome binning steps.

## 512 **Metagenomic assembly, genome binning and refinement**

513 The quality controlled reads of each individual filter fraction replicate were assembled and  
514 scaffolded using metaSPAdes v3.13 [57]. Scaffolds larger than 1 kb were used for downstream  
515 analyses. Genome binning was carried out using three binning algorithms - Abawaca v1.07 [15],

516 ESOM [58,59] and Maxbin2 v2.2.4 [60]. The values 3000 and 5000 bp as well as 5000 and  
517 10000 bp were used as *-min* and *-max* parameters to calculate 4-mer frequencies for Abawaca  
518 and ESOM (the script *esomWrapper.pl*, <https://github.com/tetramerFreqs/Binning>), and both the  
519 40 and 107 marker gene sets were utilized in Maxbin2. DASTool v1.1 [14] was used to  
520 determine the best bins among these approaches. Bins were further refined manually inside the  
521 Anvi'o workflow v6.1 [35,36]. The quality of the refined bins (completeness and  
522 contamination/redundancy) was also calculated based on domain-level single-copy core genes  
523 within Anvi'o. Genomes from each assembly were de-replicated using dRep v2.6.2 [61] at 99%  
524 ANI to remove strain level redundancy across sites, resulting into 1275 representative MAGs.  
525 Genome coverages were calculated within Anvi'o, and were normalized using number of RNA  
526 polymerase B (*rpoB*) genes identified within the metagenomic reads.

### 527 **Taxonomic assignments, gene annotations and pathway predictions**

528 Overall community composition of each metagenome was determined using phyloFlash v3.4  
529 [62] based on proportions of reads mapped to SILVA SSU rRNA Ref NR99 database, Release  
530 138 [34]. Taxonomic classification of individual MAGs was performed by GTDB-Tk v0.3.2 [63]  
531 using GTDB Release 89 as reference database. Out of the 1275 genomes GTDB-Tk classified  
532 587 genomes as *Cand. Patescibacteria* at phylum level. We used *anvi-script-gen-CPR-classifier*  
533 script from Anvi'o v6.1 [35,36] which uses supervised machine learning model (random forest  
534 classifier) to train the program and *anvi-script-predict-CPR-genomes* for predicting the  
535 probability of the MAGs to confirm the CPR genomes. The training is based on the profile of  
536 previously published 139 single copy core genes from hundreds of CPR genomes from Brown *et*  
537 *al.* [15] and Campbell *et al.* [37] as input. This model confirmed 291 out of 587 genomes as CPR  
538 with a high confidence score (75% or more). While the model was inconclusive in case of the



539 remaining 174 genomes based on low confidence score (less than 75%) and the remaining 122  
540 genomes were discarded due to their completion levels below 50%.

541 The gene annotations, coding sequences, respective protein sequences, coverage calculations and  
542 other mapping statistics for all the genomes were exported by *anvi-summarize* program from  
543 within the Anvi'o workflow. The annotations were also carried out using Prodigal v2.6.3 [64].  
544 Distilled and Refined Annotation of Metabolism (DRAM) [65] was used to generate pathway /  
545 metabolism summaries. At least one proper (other than hypothetical, uncharacterized or gene  
546 with unknown function) annotation from KEGG [66], MEROPs [67], Pfam [68] or dbCAN [69]  
547 was considered. This generated a single tab delimited annotation file listing the best hits from all  
548 these databases as well as summaries focused on most important pathways and functions. The  
549 pathway coverages (completeness) of central metabolism pathways were calculated based on  
550 KEGG modules definitions (<https://www.genome.jp/kegg/module.html>).

### 551 **Phylogenetic analysis**

552 Single copy core bacterial genes were detected in all the 1087 bacterial MAGs using hmm  
553 profile (default 'Bacteria\_71' hmm profile in Anvi'o v6.1), their protein sequences were  
554 extracted and aligned using MUSCLE [70] from within the Anvi'o [35,36]. A phylogenetic tree  
555 based on multiple sequence alignment of the 68 core proteins present in all bacterial MAGs  
556 (1087) was constructed using Approximate Maximum Likelihood in FastTree v2.1.11 SSE3,  
557 OpenMP [71] with 1000 bootstrap replications. The subset of the tree was used for arranging the  
558 metabolic pathways of 291 selected Patescibacteria MAGs in Figure 6.

### 559 **In-situ measurement of replication**

560 The forward sequencing reads from all the metagenomes were mapped to the MAGs to calculate  
561 the sequence coverage of individual contigs. These coverage profiles were utilized to calculate  
562 Growth Rate InDex (GRiD) [72] which is directly proportional to the growth rates of the cells in  
563 a given environment. GRiD measures the difference in genome copies closer to the origin of  
564 replication compared to the terminus caused by ongoing replication forks. The coverage cut-off  
565 of 0.7 was used to remove extremely low coverage contigs.

### 566 **Statistical analyses**

567 The difference in the mean genome sizes of the MAGs enriched in different filter fractions were  
568 compared using Kruskal-Wallis rank sum test followed by pairwise Dunn's test in R [73]. The  
569 proportions of gene annotations (KEGG) in the MAGs enriched in different filter fractions or  
570 oxic and anoxic wells were compared with two-proportions z-test with Yates' continuity  
571 correction in R. The p-values were adjusted for multiple testing using 'fdr' correction unless  
572 otherwise mentioned.

### 573 **Co-occurrence network analysis**

574 We used normalized average genome coverages of all the 1275 MAGs across all the  
575 metagenomes as the approximation of abundance profiles of species from respective  
576 metagenomes. This abundance matrix was used to calculate proportionality of the coverage  
577 profiles in R package propR v4.2.6 [74]. A  $\rho$  cutoff of 0.95 was used for network creation to  
578 highlight only the most relevant co-occurrences. The network was generated using the R package  
579 igraph v1.2.6 [75] and exported to Cytoscape v3.8.2 [76] for visualization using R package Rcy3  
580 v2.8.1 [77].

### 581 **Search for ORF similarity**

582 We carried out blastn [40] search on all the annotated ORFs for Patescibacteria MAGs as a query  
583 against all the ORFs of all the MAGs other than Patescibacteria. We filtered the results based on  
584 95% sequence identity over 95% query and hit ORF length with e-value cut off of 1.0e-5. We  
585 chose only one hit in case of more than one hits for the same query sequence.

## 586 **Declarations**

### 587 **Availability of data and material**

588 Data used for this study were deposited into the European Nucleotide Archive (ENA). The raw  
589 metagenomic sequencing reads were deposited under ENA project accession PRJEB36505,  
590 assemblies for individual samples were deposited under ENA project accession PRJEB36523.

### 591 **Competing interests**

592 The authors declare that they have no competing interests.

### 593 **Funding**

594 This study is part of the Collaborative Research Centre AquaDiva of the Friedrich Schiller  
595 University Jena, funded by the Deutsche Forschungsgemeinschaft (DFG, German Research  
596 Foundation) – SFB 1076 –Project Number 218627073. NMC gratefully acknowledges the  
597 support of the German Centre for Integrative Biodiversity Research (iDiv) Halle-Jena-Leipzig  
598 funded by the German Research Foundation (FZT 118 - 202548816). MT gratefully  
599 acknowledges funding from the DFG under Germany's Excellence Strategy - EXC 2051 -  
600 Project-ID 390713860. AJP, TLVB and PAFG were supported by the Ministerium für Kultur  
601 und Wissenschaft des Landes Nordrhein-Westfalen ('Nachwuchsgruppe Dr. Alexander Probst').  
602 The data analysis has been partly carried out at the High-Performance Computing (HPC) Cluster

603 EVE, a joint effort of both the Helmholtz Centre for Environmental Research - UFZ  
604 (<http://www.ufz.de/>) and the German Centre for Integrative Biodiversity Research (iDiv) Halle-  
605 Jena-Leipzig (<http://www.idiv-biodiversity.de/>).

## 606 **Authors' contributions**

607 NMC, KK, WAO, MT, AJP designed this study. WAO, KK, AJP, TLVB, and MT planned,  
608 designed, and conducted the metagenomic sampling approach. MM, MH helped during  
609 metagenomic sequencing. NMC, WAO, TLVB, and AJP performed the metagenomic analysis.  
610 NMC manually curated and performed comparative genome analysis of the MAGs. PAFG  
611 conducted the metabolic reconstruction analysis of representative MAGs. NMC, KK, WAO  
612 wrote the manuscript with the help of all authors.

## 613 **Acknowledgements**

614 We thank Patricia Geesink and Falko Gutmann for filtration and DNA extraction of groundwater  
615 samples, and the Hainich CZE site manager Robert Lehmann for their assistance with sample  
616 preparation, collection, and filtration. Additionally, we thank Ivonne Görlich and Marco Groth  
617 from the Core Facility DNA sequencing of the Leibniz Institute on Aging - Fritz Lipmann  
618 Institute in Jena for their help with Illumina sequencing. We also thank Syrie Hermans for  
619 providing preliminary data from time-series analysis of 16S rRNA gene amplicon sequencing for  
620 some of the groundwater wells.

## 621 **References**

- 622 1. Hug LA, Baker BJ, Anantharaman K, Brown CT, Probst AJ, Castelle CJ, et al. A new view of the tree  
623 of life. *Nature Microbiology*. 2016;1:16048.
- 624 2. Elshahed MS, Najjar FZ, Aycocock M, Qu C, Roe BA, Krumholz LR. Metagenomic analysis of the  
625 microbial community at Zodletone Spring (Oklahoma): insights into the genome of a member of the

- 626 novel candidate division OD1. *Applied and environmental microbiology*. Am Soc Microbiol;  
627 2005;71:7598–602.
- 628 3. Wrighton KC, Thomas BC, Sharon I, Miller CS, Castelle CJ, VerBerkmoes NC, et al. Fermentation,  
629 hydrogen, and sulfur metabolism in multiple uncultivated bacterial phyla. *Science*. American Association  
630 for the Advancement of Science; 2012;337:1661–5.
- 631 4. Mohiuddin MM, Salama Y, Schellhorn HE, Golding GB. Shotgun metagenomic sequencing reveals  
632 freshwater beach sands as reservoir of bacterial pathogens. *Water Research*. 2017;115:360–9.
- 633 5. Rinke C, Schwientek P, Sczyrba A, Ivanova NN, Anderson IJ, Cheng J-F, et al. Insights into the  
634 phylogeny and coding potential of microbial dark matter. *Nature*. 2013;499:431–7.
- 635 6. Probst AJ, Castelle CJ, Singh A, Brown CT, Anantharaman K, Sharon I, et al. Genomic resolution of a  
636 cold subsurface aquifer community provides metabolic insights for novel microbes adapted to high CO<sub>2</sub>  
637 concentrations. *Environ Microbiol*. England; 2017;19:459–74.
- 638 7. Probst AJ, Ladd B, Jarett JK, Geller-McGrath DE, Sieber CM, Emerson JB, et al. Differential depth  
639 distribution of microbial function and putative symbionts through sediment-hosted aquifers in the deep  
640 terrestrial subsurface. *Nature microbiology*. Nature Publishing Group; 2018;3:328–36.
- 641 8. Correa-Galeote D, Bedmar EJ, Fernández-González AJ, Fernández-López M, Arone GJ. Bacterial  
642 Communities in the Rhizosphere of Amilaceous Maize (*Zea mays* L.) as Assessed by Pyrosequencing.  
643 *Frontiers in Plant Science*. 2016;7:1016.
- 644 9. Frey B, Rime T, Phillips M, Stierli B, Hajdas I, Widmer F, et al. Microbial diversity in European alpine  
645 permafrost and active layers. *FEMS Microbiology Ecology* [Internet]. 2016;92. Available from:  
646 <https://doi.org/10.1093/femsec/fiw018>
- 647 10. Wurzbacher C, Nilsson RH, Rautio M, Peura S. Poorly known microbial taxa dominate the  
648 microbiome of permafrost thaw ponds. *The ISME journal*. Nature Publishing Group; 2017;11:1938–41.
- 649 11. Beam JP, Becraft ED, Brown JM, Schulz F, Jarett JK, Bezuidt O, et al. Ancestral absence of electron  
650 transport chains in Patescibacteria and DPANN. *Frontiers in microbiology*. Frontiers; 2020;11:1848.
- 651 12. He X, McLean JS, Edlund A, Yooseph S, Hall AP, Liu S-Y, et al. Cultivation of a human-associated  
652 TM7 phylotype reveals a reduced genome and epibiotic parasitic lifestyle. *Proc Natl Acad Sci U S A*.  
653 2015;112:244–9.
- 654 13. Baker JL, Morton JT, Dinis M, Alvarez R, Tran NC, Knight R, et al. Deep metagenomics examines  
655 the oral microbiome during dental caries, revealing novel taxa and co-occurrences with host molecules.  
656 *Genome research*. Cold Spring Harbor Lab; 2021;31:64–74.
- 657 14. Shaiber A, Willis AD, Delmont TO, Roux S, Chen L-X, Schmid AC, et al. Functional and genetic  
658 markers of niche partitioning among enigmatic members of the human oral microbiome. *Genome*  
659 *biology*. BioMed Central; 2020;21:1–35.
- 660 15. Brown CT, Hug LA, Thomas BC, Sharon I, Castelle CJ, Singh A, et al. Unusual biology across a  
661 group comprising more than 15% of domain Bacteria. *Nature*. Nature Publishing Group; 2015;523:208–  
662 11.

- 663 16. Danczak R, Johnston M, Kenah C, Slattery M, Wrighton KC, Wilkins M. Members of the Candidate  
664 Phyla Radiation are functionally differentiated by carbon-and nitrogen-cycling capabilities. *Microbiome*.  
665 Springer; 2017;5:1–14.
- 666 17. Herrmann M, Wegner C-E, Taubert M, Geesink P, Lehmann K, Yan L, et al. Predominance of Cand.  
667 Patescibacteria in groundwater is caused by their preferential mobilization from soils and flourishing  
668 under oligotrophic conditions. *Frontiers in microbiology*. Frontiers; 2019;10:1407.
- 669 18. He C, Keren R, Whittaker ML, Farag IF, Doudna JA, Cate JH, et al. Genome-resolved metagenomics  
670 reveals site-specific diversity of episymbiotic CPR bacteria and DPANN archaea in groundwater  
671 ecosystems. *Nature microbiology*. Nature Publishing Group; 2021;6:354–65.
- 672 19. Vigneron A, Cruaud P, Langlois V, Lovejoy C, Culley AI, Vincent WF. Ultra-small and abundant:  
673 Candidate phyla radiation bacteria are potential catalysts of carbon transformation in a thermokarst lake  
674 ecosystem. *Limnology and Oceanography Letters*. Wiley Online Library; 2020;5:212–20.
- 675 20. Vavourakis CD, Andrei A-S, Mehrshad M, Ghai R, Sorokin DY, Muyzer G. A metagenomics  
676 roadmap to the uncultured genome diversity in hypersaline soda lake sediments. *Microbiome*. Springer;  
677 2018;6:1–18.
- 678 21. Luef B, Frischkorn KR, Wrighton KC, Holman H-YN, Birarda G, Thomas BC, et al. Diverse  
679 uncultivated ultra-small bacterial cells in groundwater. *Nature communications*. Nature Publishing Group;  
680 2015;6:1–8.
- 681 22. Castelle CJ, Banfield JF. Major new microbial groups expand diversity and alter our understanding of  
682 the tree of life. *Cell*. Elsevier; 2018;172:1181–97.
- 683 23. Gleeson T, Befus KM, Jasechko S, Luijendijk E, Cardenas MB. The global volume and distribution of  
684 modern groundwater. *Nature Geoscience*. 2016;9:161–7.
- 685 24. Krüger M, Potthast K, Michalzik B, Tischer A, Küsel K, Deckner FF, et al. Drought and rewetting  
686 events enhance nitrate leaching and seepage-mediated translocation of microbes from beech forest soils.  
687 *Soil Biology and Biochemistry*. Elsevier; 2021;154:108153.
- 688 25. Albertsen M, Hugenholtz P, Skarshewski A, Nielsen KL, Tyson GW, Nielsen PH. Genome sequences  
689 of rare, uncultured bacteria obtained by differential coverage binning of multiple metagenomes. *Nature*  
690 *biotechnology*. Nature Publishing Group; 2013;31:533–8.
- 691 26. Gong J, Qing Y, Guo X, Warren A. “Candidatus *Sonnebornia yantaiensis*”, a member of candidate  
692 division OD1, as intracellular bacteria of the ciliated protist *Paramecium bursaria* (Ciliophora,  
693 Oligohymenophorea). *Systematic and applied microbiology*. Elsevier; 2014;37:35–41.
- 694 27. Bor B, Collins A, Murugkar P, Balasubramanian S, To T, Hendrickson E, et al. Insights obtained by  
695 culturing Saccharibacteria with their bacterial hosts. *Journal of dental research*. SAGE Publications Sage  
696 CA: Los Angeles, CA; 2020;99:685–94.
- 697 28. Cross KL, Campbell JH, Balachandran M, Campbell AG, Cooper SJ, Griffen A, et al. Targeted  
698 isolation and cultivation of uncultivated bacteria by reverse genomics. *Nature biotechnology*. Nature  
699 Publishing Group; 2019;37:1314–21.

- 700 29. Murugkar PP, Collins AJ, Chen T, Dewhirst FE. Isolation and cultivation of candidate phyla radiation  
701 Saccharibacteria (TM7) bacteria in coculture with bacterial hosts. *Journal of oral microbiology*. Taylor &  
702 Francis; 2020;12:1814666.
- 703 30. Giovannoni SJ, Thrash JC, Temperton B. Implications of streamlining theory for microbial ecology.  
704 *The ISME journal*. Nature Publishing Group; 2014;8:1553–65.
- 705 31. Dufresne A, Garczarek L, Partensky F. Accelerated evolution associated with genome reduction in a  
706 free-living prokaryote. *Genome biology*. Springer; 2005;6:1–10.
- 707 32. Küsel K, Totsche KU, Trumbore SE, Lehmann R, Steinhäuser C, Herrmann M. How deep can surface  
708 signals be traced in the critical zone? Merging biodiversity with biogeochemistry research in a central  
709 German Muschelkalk landscape. *Frontiers in Earth Science*. Frontiers; 2016;4:32.
- 710 33. Yan L, Herrmann M, Kampe B, Lehmann R, Totsche KU, Küsel K. Environmental selection shapes  
711 the formation of near-surface groundwater microbiomes. *Water research*. Elsevier; 2020;170:115341.
- 712 34. Quast C, Pruesse E, Yilmaz P, Gerken J, Schweer T, Yarza P, et al. The SILVA ribosomal RNA gene  
713 database project: improved data processing and web-based tools. *Nucleic acids research*. Oxford  
714 University Press; 2012;41:D590–6.
- 715 35. Eren AM, Esen ÖC, Quince C, Vineis JH, Morrison HG, Sogin ML, et al. Anvi'o: an advanced  
716 analysis and visualization platform for 'omics data. *PeerJ*. PeerJ Inc.; 2015;3:e1319.
- 717 36. Eren AM, Kiefl E, Shaiber A, Veseli I, Miller SE, Schechter MS, et al. Community-led, integrated,  
718 reproducible multi-omics with anvi'o. *Nature microbiology*. Nature Publishing Group; 2021;6:3–6.
- 719 37. Campbell JH, O'Donoghue P, Campbell AG, Schwientek P, Sczyrba A, Woyke T, et al. UGA is an  
720 additional glycine codon in uncultured SR1 bacteria from the human microbiota. *Proceedings of the  
721 National Academy of Sciences*. National Acad Sciences; 2013;110:5540–5.
- 722 38. Kersey CM, Agyemang PA, Dumenyo CK. CorA, the magnesium/nickel/cobalt transporter, affects  
723 virulence and extracellular enzyme production in the soft rot pathogen *Pectobacterium carotovorum*.  
724 *Molecular plant pathology*. Wiley Online Library; 2012;13:58–71.
- 725 39. Porcheron G, Garénaux A, Proulx J, Sabri M, Dozois CM. Iron, copper, zinc, and manganese  
726 transport and regulation in pathogenic Enterobacteria: correlations between strains, site of infection and  
727 the relative importance of the different metal transport systems for virulence. *Frontiers in cellular and  
728 infection microbiology*. Frontiers; 2013;3:90.
- 729 40. Altschul SF, Gish W, Miller W, Myers EW, Lipman DJ. Basic local alignment search tool. *Journal of  
730 molecular biology*. Elsevier; 1990;215:403–10.
- 731 41. Yan L, Hermans SM, Totsche KU, Lehmann R, Herrmann M, Küsel K. Groundwater bacterial  
732 communities evolve over time in response to recharge. *Water Research*. Elsevier; 2021;117290.
- 733 42. Tian R, Ning D, He Z, Zhang P, Spencer SJ, Gao S, et al. Small and mighty: adaptation of  
734 superphylum Patescibacteria to groundwater environment drives their genome simplicity. *Microbiome*.  
735 BioMed Central; 2020;8:1–15.

- 736 43. Castelle CJ, Brown CT, Thomas BC, Williams KH, Banfield JF. Unusual respiratory capacity and  
737 nitrogen metabolism in a Parcubacterium (OD1) of the Candidate Phyla Radiation. *Scientific reports*.  
738 Nature Publishing Group; 2017;7:1–12.
- 739 44. Kohlhepp B, Lehmann R, Seeber P, Küsel K, Trumbore SE, Totsche KU. Aquifer configuration and  
740 geostructural links control the groundwater quality in thin-bedded carbonate–siliciclastic alternations of  
741 the Hainich CZE, central Germany. *Hydrology and Earth System Sciences*. Copernicus GmbH;  
742 2017;21:6091–116.
- 743 45. Opitz S, Küsel K, Spott O, Totsche KU, Herrmann M. Oxygen availability and distance to surface  
744 environments determine community composition and abundance of ammonia-oxidizing prokaryotes in  
745 two superimposed pristine limestone aquifers in the Hainich region, Germany. *FEMS Microbiology  
746 Ecology*. 2014;90:39–53.
- 747 46. Wegner C-E, Gaspar M, Geesink P, Herrmann M, Marz M, Küsel K, et al. Biogeochemical Regimes  
748 in Shallow Aquifers Reflect the Metabolic Coupling of the Elements Nitrogen, Sulfur, and Carbon.  
749 *Applied and Environmental Microbiology*. 2019;85:e02346-18.
- 750 47. Ozawa K, Meikari T, Motohashi K, Yoshida M, Akutsu H. Evidence for the presence of an F-type  
751 ATP synthase involved in sulfate respiration in *Desulfovibrio vulgaris*. *J Bacteriol. American Society for  
752 Microbiology*; 2000;182:2200–6.
- 753 48. Nelson WC, Stegen JC. The reduced genomes of Parcubacteria (OD1) contain signatures of a  
754 symbiotic lifestyle. *Frontiers in microbiology*. *Frontiers*; 2015;6:713.
- 755 49. Levin PA, Angert ER. Small but mighty: cell size and bacteria. *Cold Spring Harbor Perspectives in  
756 Biology*. Cold Spring Harbor Lab; 2015;7:a019216.
- 757 50. Kempes CP, Wang L, Amend JP, Doyle J, Hoehler T. Evolutionary tradeoffs in cellular composition  
758 across diverse bacteria. *The ISME journal*. Nature Publishing Group; 2016;10:2145–57.
- 759 51. Melville S, Craig L. Type IV pili in Gram-positive bacteria. *Microbiology and molecular biology  
760 reviews*. *Am Soc Microbiol*; 2013;77:323–41.
- 761 52. Craig L, Volkmann N, Arvai AS, Pique ME, Yeager M, Egelman EH, et al. Type IV pilus structure by  
762 cryo-electron microscopy and crystallography: implications for pilus assembly and functions. *Molecular  
763 cell*. Elsevier; 2006;23:651–62.
- 764 53. Mandlik A, Swierczynski A, Das A, Ton-That H. Pili in Gram-positive bacteria: assembly,  
765 involvement in colonization and biofilm development. *Trends in microbiology*. Elsevier; 2008;16:33–40.
- 766 54. Xie B, Wang J, Nie Y, Chen D, Hu B, Wu X, et al. EpicPCR-Directed Cultivation of a Candidatus  
767 *Saccharibacteria Symbiont* Reveals a Type IV Pili-dependent Epibiotic Lifestyle. *bioRxiv [Internet]*. Cold  
768 Spring Harbor Laboratory; 2021; Available from:  
769 <https://www.biorxiv.org/content/early/2021/07/08/2021.07.08.451036>
- 770 55. Coleman GA, Davín AA, Mahendrarajah TA, Szánthó LL, Spang A, Hugenholtz P, et al. A rooted  
771 phylogeny resolves early bacterial evolution. *Science*. American Association for the Advancement of  
772 Science; 2021;372.



- 773 56. Lehmann K, Lehmann R, Totsche KU. Event-driven dynamics of the total mobile inventory in  
774 undisturbed soil account for significant fluxes of particulate organic carbon. *Science of The Total*  
775 *Environment*. Elsevier; 2021;756:143774.
- 776 57. Nurk S, Meleshko D, Korobeynikov A, Pevzner PA. metaSPAdes: a new versatile metagenomic  
777 assembler. *Genome research*. Cold Spring Harbor Lab; 2017;27:824–34.
- 778 58. Ultsch A, Mörchen F. ESOM-Maps: tools for clustering, visualization, and classification with  
779 Emergent SOM. DATA BIONICS RESEARCH GROUP, UNIVERSITY OF MARBURG; 2005.
- 780 59. Dick GJ, Andersson AF, Baker BJ, Simmons SL, Thomas BC, Yelton AP, et al. Community-wide  
781 analysis of microbial genome sequence signatures. *Genome biology*. Springer; 2009;10:1–16.
- 782 60. Wu Y-W, Simmons BA, Singer SW. MaxBin 2.0: an automated binning algorithm to recover  
783 genomes from multiple metagenomic datasets. *Bioinformatics*. Oxford University Press; 2016;32:605–7.
- 784 61. Olm MR, Brown CT, Brooks B, Banfield JF. dRep: a tool for fast and accurate genomic comparisons  
785 that enables improved genome recovery from metagenomes through de-replication. *The ISME Journal*.  
786 2017;11:2864–8.
- 787 62. Gruber-Vodicka HR, Seah BK, Pruesse E. phyloFlash: Rapid small-subunit rRNA profiling and  
788 targeted assembly from metagenomes. *Msystems*. Am Soc Microbiol; 2020;5:e00920-20.
- 789 63. Chaumeil P-A, Mussig AJ, Hugenholtz P, Parks DH. GTDB-Tk: a toolkit to classify genomes with  
790 the Genome Taxonomy Database. Oxford University Press; 2020.
- 791 64. Hyatt D, Chen G-L, LoCascio PF, Land ML, Larimer FW, Hauser LJ. Prodigal: prokaryotic gene  
792 recognition and translation initiation site identification. *BMC bioinformatics*. BioMed Central;  
793 2010;11:1–11.
- 794 65. Shaffer M, Borton MA, McGivern BB, Zayed AA, La Rosa SL, Solden LM, et al. DRAM for  
795 distilling microbial metabolism to automate the curation of microbiome function. *Nucleic acids research*.  
796 Oxford University Press; 2020;48:8883–900.
- 797 66. Kanehisa M, Furumichi M, Tanabe M, Sato Y, Morishima K. KEGG: new perspectives on genomes,  
798 pathways, diseases and drugs. *Nucleic acids research*. Oxford University Press; 2017;45:D353–61.
- 799 67. Rawlings ND, Barrett AJ, Bateman A. MEROPS: the peptidase database. *Nucleic acids research*.  
800 Oxford University Press; 2010;38:D227–33.
- 801 68. El-Gebali S, Mistry J, Bateman A, Eddy SR, Luciani A, Potter SC, et al. The Pfam protein families  
802 database in 2019. *Nucleic acids research*. Oxford University Press; 2019;47:D427–32.
- 803 69. Zhang H, Yohe T, Huang L, Entwistle S, Wu P, Yang Z, et al. dbCAN2: a meta server for automated  
804 carbohydrate-active enzyme annotation. *Nucleic acids research*. Oxford University Press; 2018;46:W95–  
805 101.
- 806 70. Edgar RC. MUSCLE: multiple sequence alignment with high accuracy and high throughput. *Nucleic*  
807 *acids research*. Oxford University Press; 2004;32:1792–7.

- 808 71. Price MN, Dehal PS, Arkin AP. FastTree 2—approximately maximum-likelihood trees for large  
809 alignments. *PLoS one*. Public Library of Science San Francisco, USA; 2010;5:e9490.
- 810 72. Emiola A, Oh J. High throughput in situ metagenomic measurement of bacterial replication at ultra-  
811 low sequencing coverage. *Nature communications*. Nature Publishing Group; 2018;9:1–8.
- 812 73. R Core Team. R: A Language and Environment for Statistical Computing [Internet]. Vienna, Austria:  
813 R Foundation for Statistical Computing; 2020. Available from: <https://www.R-project.org/>
- 814 74. Quinn TP, Richardson MF, Lovell D, Crowley TM. propr: an R-package for identifying  
815 proportionally abundant features using compositional data analysis. *Scientific reports*. Nature Publishing  
816 Group; 2017;7:1–9.
- 817 75. Csardi G, Nepusz T. The igraph software package for complex network research. *InterJournal*.  
818 2006;Complex Systems:1695.
- 819 76. Shannon P, Markiel A, Ozier O, Baliga NS, Wang JT, Ramage D, et al. Cytoscape: a software  
820 environment for integrated models of biomolecular interaction networks. *Genome research*. Cold Spring  
821 Harbor Lab; 2003;13:2498–504.
- 822 77. Gustavsen JA, Pai S, Isserlin R, Demchak B, Pico AR. RCy3: Network biology using Cytoscape from  
823 within R. *F1000Research*. Faculty of 1000 Ltd; 2019;8.
- 824 78. Kassambara A. rstatix: Pipe-Friendly Framework for Basic Statistical Tests [Internet]. 2020.  
825 Available from: <https://CRAN.R-project.org/package=rstatix>

## 826 **Figure Legends**

### 827 **Figure 1: Community composition of the groundwater samples based on metagenomic reads**

828 **mapped against the SILVA (SSU rRNA Ref NR99) database.** Each column represents a metagenomic  
829 sample replicate for specified filter fractions from respective wells of the limestone-mudstone strata that  
830 host the multi-story upper aquifer assemblage (HTU; wells H14, H32, H43, H52) and the karstified main  
831 aquifer (HTL; wells H41, H51).

### 832 **Figure 2: Community composition showing taxonomic preferences of Patescibacteria in wells and**

833 **filter fractions across the Hainich transect.** The cross section of the studied groundwater transect (from  
834 Kohlhepp *et al.*, 2017 [44], modified) shows the karstified main aquifer [HTL; (wells studied: H41, H51)]  
835 that is characterized by higher surface-connection to preferential recharge areas and the hanging thin-  
836 bedded alternating limestone-mudstone strata that host the multi-story upper aquifer assemblage (HTU;  
837 wells studied H14, H32, H43, H52). Height above mean sea level (amsl), in meters, is shown along the y-

838 axis and length of hillslope is shown in meters along the x-axis. The colored pie charts show percentages  
839 of taxa within Patescibacteria at order level. The underlined taxon, *Parcubacteria;other* (all Parcubacteria  
840 other than the mentioned Parcubacteria orders merged together) was most abundant among  
841 Patescibacteria in all the filter fractions of all the wells. The grey pie charts show the relative percentage  
842 of Patescibacteria in the total community. The table includes levels of various hydrochemical parameters  
843 of the studied wells, including the dissolved oxygen, measured during July 2014 - April 2017 [33].

844 **Figure 3: Phylogenetic placement of Patescibacteria MAGs after binning and refinement. A.**

845 Genome completeness distribution of the MAGs classified as Patescibacteria by GTDB-Tk alone (174,  
846 orange-colored bars), and by both GTDB-Tk and Anvi'o (291, teal-colored bars). **B.** Phylogenetic tree  
847 based on 68 core proteins from all bacterial MAGs (1087) using Maximum Likelihood in FastTree2 with  
848 1000 bootstrap replications. Bacterial taxa other than Patescibacteria were collapsed together and only  
849 Patescibacteria are colored as per their taxonomic assignments from GTDB-Tk. The bootstrap values of 0.9  
850 and above are indicated by filled circles. The phylogenetic tree is supplied as Additional file 3.

851 **Figure 4: Distribution of genome sizes of Patescibacteria MAGs enriched in 0.1  $\mu\text{m}$  and 0.2  $\mu\text{m}$**

852 **filter fractions. A.** For all 291 high-quality Patescibacteria MAGs, the ratio of average normalized  
853 genome coverage in 0.1  $\mu\text{m}$  filter fractions to 0.2  $\mu\text{m}$  filter fractions from metagenomes was used to form  
854 three groups: '0.1  $\mu\text{m}$  filter' - MAGs where this ratio was at least 5, '0.2  $\mu\text{m}$  filter' - MAGs where this  
855 ratio was  $\frac{1}{5}$  or less, and 'None' - MAGs other than first two groups. The mean genome sizes were  
856 significantly different (Kruskal-Wallis rank sum test,  $p = 2.24e-06$ ). Pairwise Dunn's test showed the  
857 genome sizes were significantly different between '0.1  $\mu\text{m}$  filter' and '0.2  $\mu\text{m}$  filter' (fdr adjusted  $p =$   
858  $1.02e-06$ ), and between '0.2  $\mu\text{m}$  filter' and 'None' (fdr adjusted  $p = 9.08e-05$ ). **B.** The scatter plot shows  
859 the distribution of  $\log_2$  filter enrichment factors (the ratio of average normalized genome coverage in 0.2  
860  $\mu\text{m}$  filter fractions to 0.1  $\mu\text{m}$  filter fractions from metagenomes) of Patescibacteria MAGs, as the function  
861 of their genome sizes. The dashed lines indicate the cut-off value of 5 and  $\frac{1}{5}$  for filter enrichment factors  
862 on the y-axis.

863 **Figure 5: The estimated growth rate index (GRiD) distribution of Patescibacteria MAGs across the**  
864 **metagenomes. A.** Well-wise GRiD distribution of all Patescibacteria. **B.** GRiD distribution of classes of  
865 Patescibacteria in 0.1  $\mu\text{m}$  and 0.2  $\mu\text{m}$  filter fractions. The statistical significance was calculated by using  
866 the `t_test` function with FDR correction in R package *rstatix* [78].

867 **Figure 6: Metabolic and functional repertoire of the high quality Patescibacteria MAGs.** The  
868 heatmap shows completeness of pathways and presence/absence of the functions in 291 high-quality  
869 Patescibacteria genomes annotated within DRAM [65], arranged according to their phylogenetic  
870 placement. Clade background colors within the phylogenetic tree represent respective taxonomic classes  
871 of Patescibacteria. Colored triangles next to each genome represent their enrichment in 0.1  $\mu\text{m}$  filter  
872 fractions (green), 0.2  $\mu\text{m}$  filter fractions (red), anoxic wells (blue) and oxic wells (orange), respectively.  
873 Electron transport chain complexes I-IV, sulfur metabolism functions, and photosynthesis related genes  
874 were absent from almost all the MAGs. A similar heatmap arranged as per the 5-fold enrichment of the  
875 MAGs in oxic and anoxic wells is provided as Additional file 5, Figure S2.

876 **Figure 7: Cell schematic representing the functional repertoire of most abundant model**  
877 **Patescibacteria from oxic and anoxic groundwater wells.** The common and genome specific gene  
878 features are shown for the three representative genomes based on KEGG pathways. The pie diagrams next  
879 to each reaction or function state the presence of respective enzymes or proteins in the three model  
880 organisms as per the color key (oxic representatives in green and blue, and the anoxic representative in  
881 pink), while absence is indicated by white color.

882 **Figure 8: Co-occurrence network among the MAGs recovered from the studied groundwater wells.**  
883 The proportionality network was constructed using normalized average coverages of the MAGs enriched  
884 (by 5-fold coverage difference) in 0.2  $\mu\text{m}$  filter fractions as compared to 0.1  $\mu\text{m}$  filter fractions to retain  
885 Patescibacteria possibly attached to other microbial hosts. The filled oval regions highlight the direct one-  
886 to-one associations of Patescibacteria MAGs paired with Omnitrophota MAGs. The zoomed-in cluster  
887 shows direct associations of Patescibacteria MAGs (filled red circles) with multiple Nitrospirota (filled

888 blue circles) and Bacteroidota (filled cyan circles) MAGs highlighted with black outlines and arrows,  
889 while grey outlines and arrows indicate indirect associations. For construction of the proportionality  
890 network,  $\rho$  (rho) value cut-off of 0.95 was used.

## 891 **Additional files**

892 **Additional file 1:** Single copy genes from publically available CPR genomes used to predict CPR MAGs  
893 in this study. The file was taken from Anvi'o codebase (<https://github.com/merenlab/anvio>).

894 **Additional file 2:** Genome statistics and taxonomic assignments of Patescibacteria MAGs in this study.

895 **Additional file 3:** The Newick tree file for phylogenetic tree shown in Figure 3, B.

896 **Additional file 4, Figure S1:** Correlation of average normalized genome coverages of Patescibacteria  
897 MAGs from respective wells with respective GRiD values.

898 **Additional file 5, Figure S2:** Metabolic and functional repertoire of high quality Patescibacteria MAGs.  
899 The heatmap shows completeness of pathways and presence/absence of functions in 291 high-quality  
900 Patescibacteria genomes annotated with DRAM, arranged according to their enrichment in oxic and  
901 anoxic wells based on 5-fold coverage criterion.

902 **Additional file 6:** Correlations of average normalized genome coverages of Patescibacteria MAGs  
903 enriched in oxic wells with dissolved oxygen and nitrate concentration.

904 **Additional file 7:** Genomic coverages of 1275 microbial MAGs in all studied metagenomes.

905 **Additional file 8, Figure S3:** Coverage distribution of selected MAGs from the network in Figure 8.  
906 Only the direct one-to-one pairs of Patescibacteria with other MAGs are plotted.

907 **Additional file 9, Figure S4:** Coverage distribution of selected MAGs from the highlighted cluster in  
908 network in Figure 8. Only the direct connections of Patescibacteria with other MAGs are plotted.

909

Figure 1

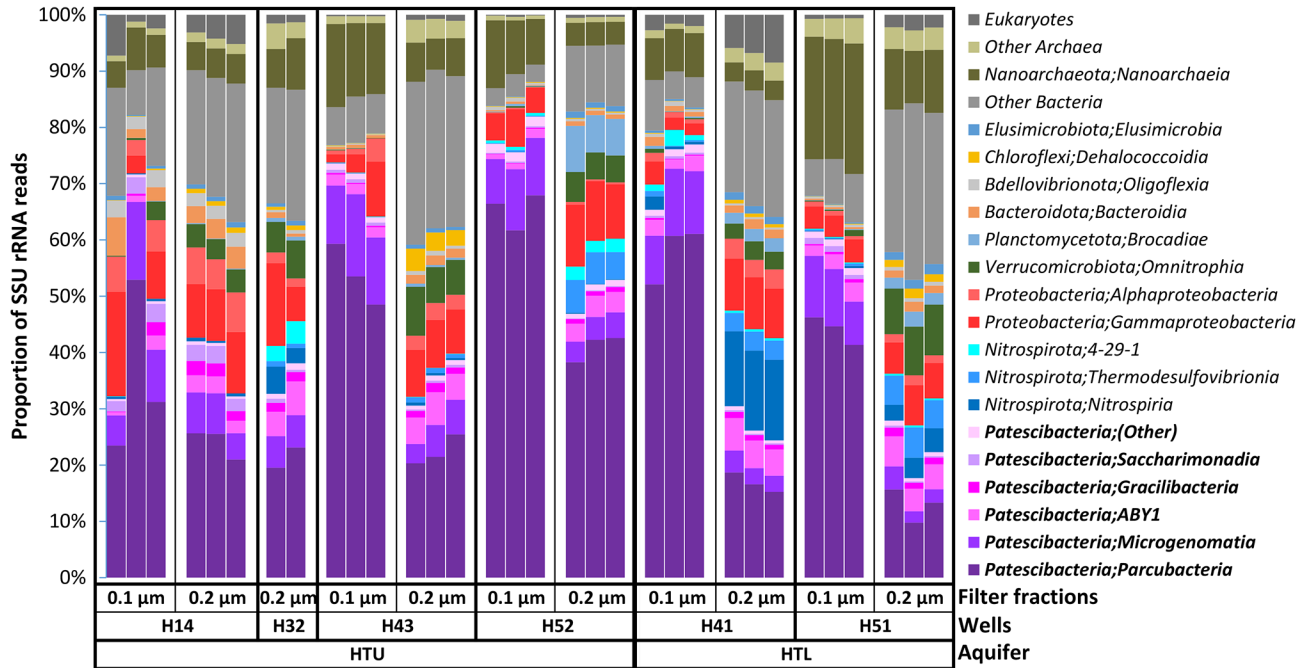

**Figure 2**
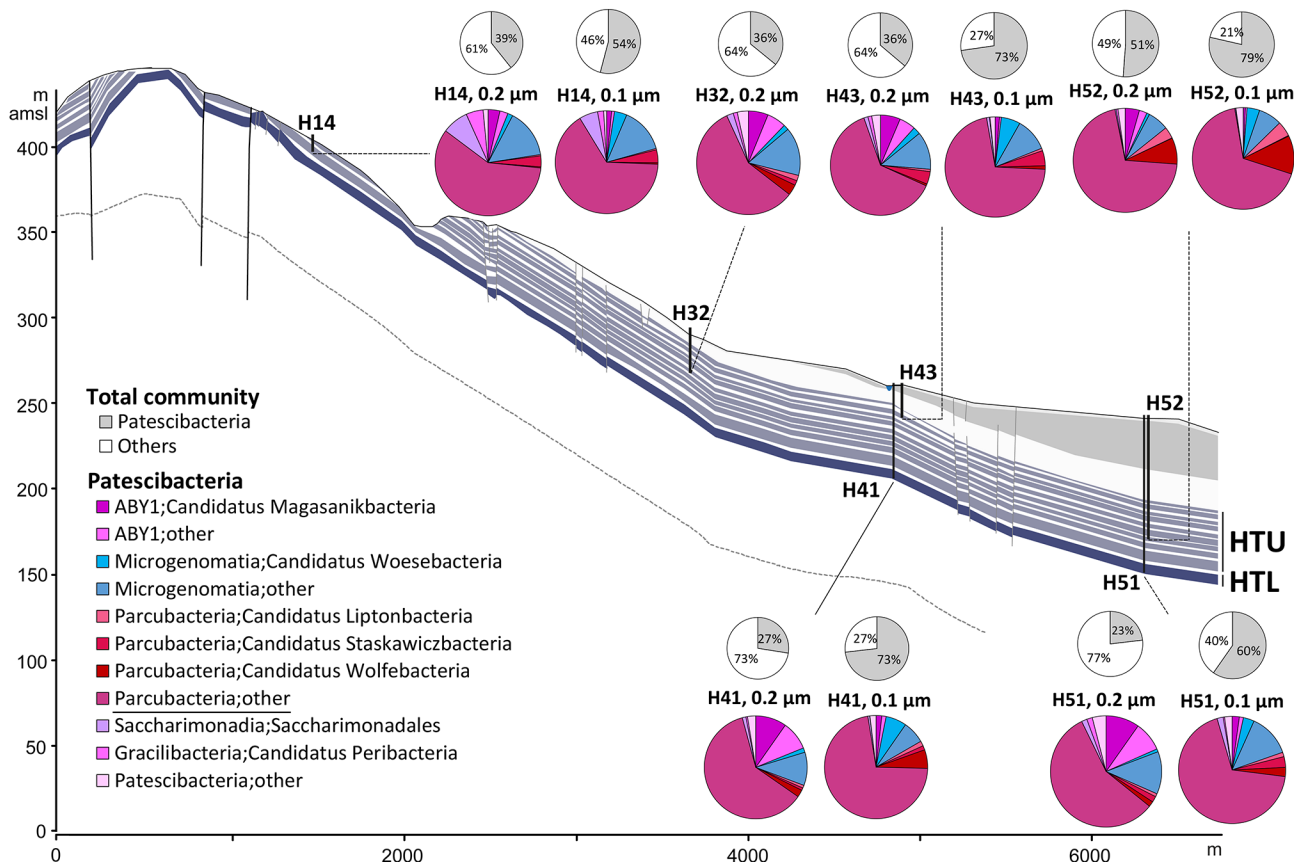

|     |     | pH                      | Dissolved Oxygen (mg/L)   | Ammonium (mg/L)          | Nitrate (mg/L)               | Sulphate (mg/L)                  |
|-----|-----|-------------------------|---------------------------|--------------------------|------------------------------|----------------------------------|
| HTU | H14 | 6.98 ± 0.09 (6.8 - 7.2) | 0.61 ± 0.58 (0.1 - 2.54)  | 0.01 ± 0.02 (0 - 0.06)   | 1.29 ± 0.21 (0.77 - 1.52)    | 26.72 ± 2.16 (23.88 - 30.2)      |
|     | H32 | 7.31 ± 0.07 (7.2 - 7.5) | 2.23 ± 0.56 (1.31 - 3.41) | 0.01 ± 0.02 (0 - 0.11)   | 28.51 ± 8.22 (12.57 - 40.58) | 73.12 ± 5.25 (63.18 - 91.64)     |
|     | H43 | 7.14 ± 0.07 (7 - 7.3)   | 0                         | 0.09 ± 0.06 (0 - 0.27)   | 1.55 ± 3.92 (0.01 - 11.99)   | 38.52 ± 1.94 (35.15 - 47.06)     |
|     | H52 | 7.31 ± 0.06 (7.1 - 7.4) | 0                         | 0.41 ± 0.1 (0.13 - 0.58) | 5.35 ± 4.37 (0.07 - 16.32)   | 88.66 ± 8.22 (72.81 - 102.95)    |
| HTL | H41 | 7.25 ± 0.17 (7.1 - 8.1) | 4.83 ± 1.7 (1.77 - 8.04)  | 0.12 ± 0.1 (0 - 0.33)    | 10.16 ± 4.41 (2.51 - 23.33)  | 91.62 ± 20.76 (59.44 - 140.48)   |
|     | H51 | 7.15 ± 0.09 (6.9 - 7.3) | 2.73 ± 0.31 (2.21 - 3.29) | 0.04 ± 0.12 (0 - 0.68)   | 8.12 ± 3.27 (4.87 - 21.05)   | 289.47 ± 19.95 (253.96 - 337.19) |

**Figure 3**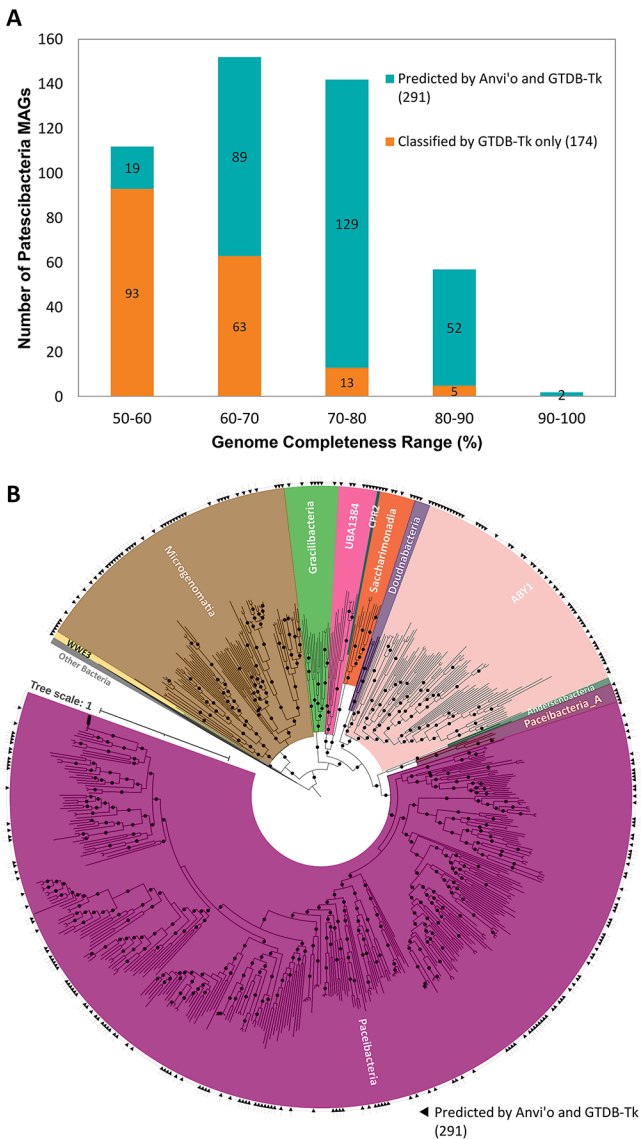



**Figure 4**

**A**

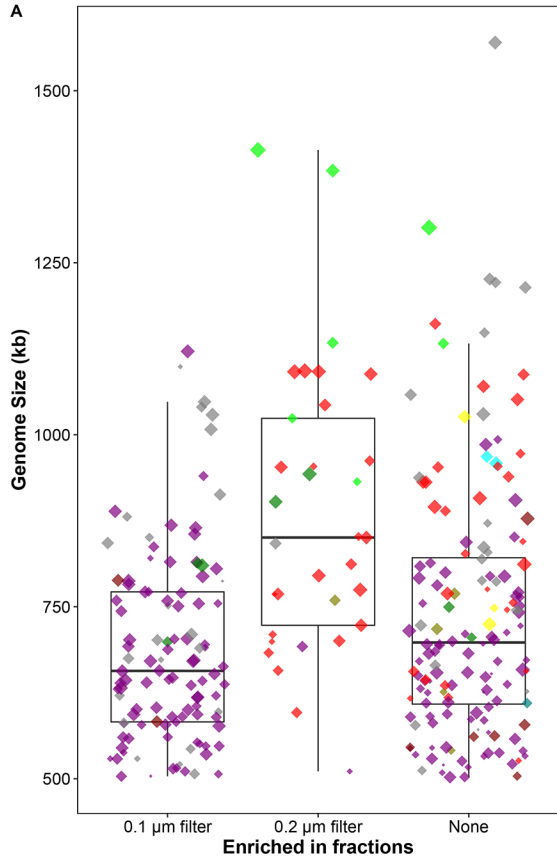

**B**

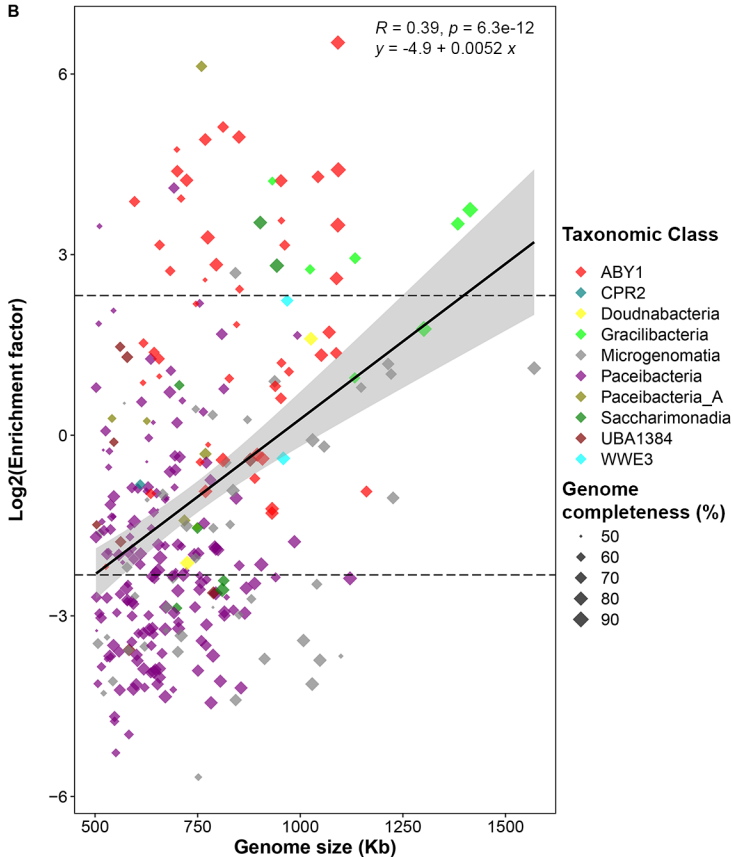

**Figure 5**

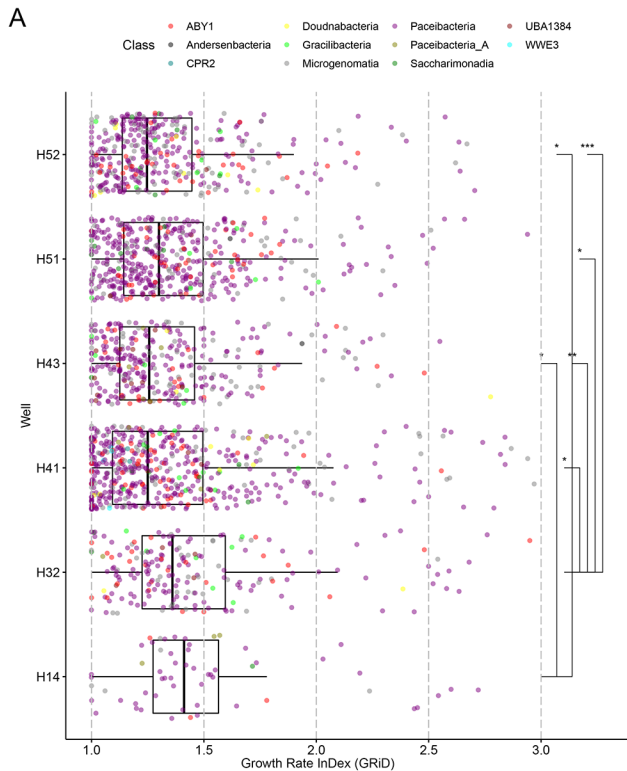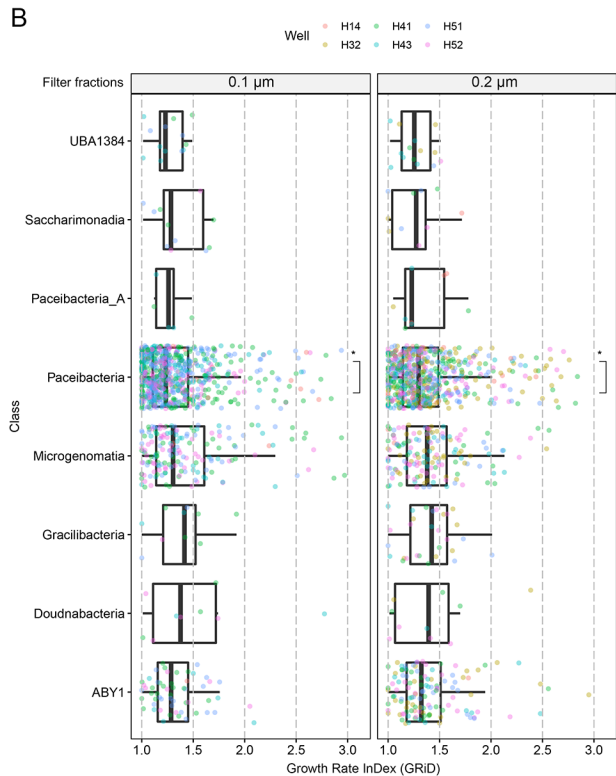

Figure 6

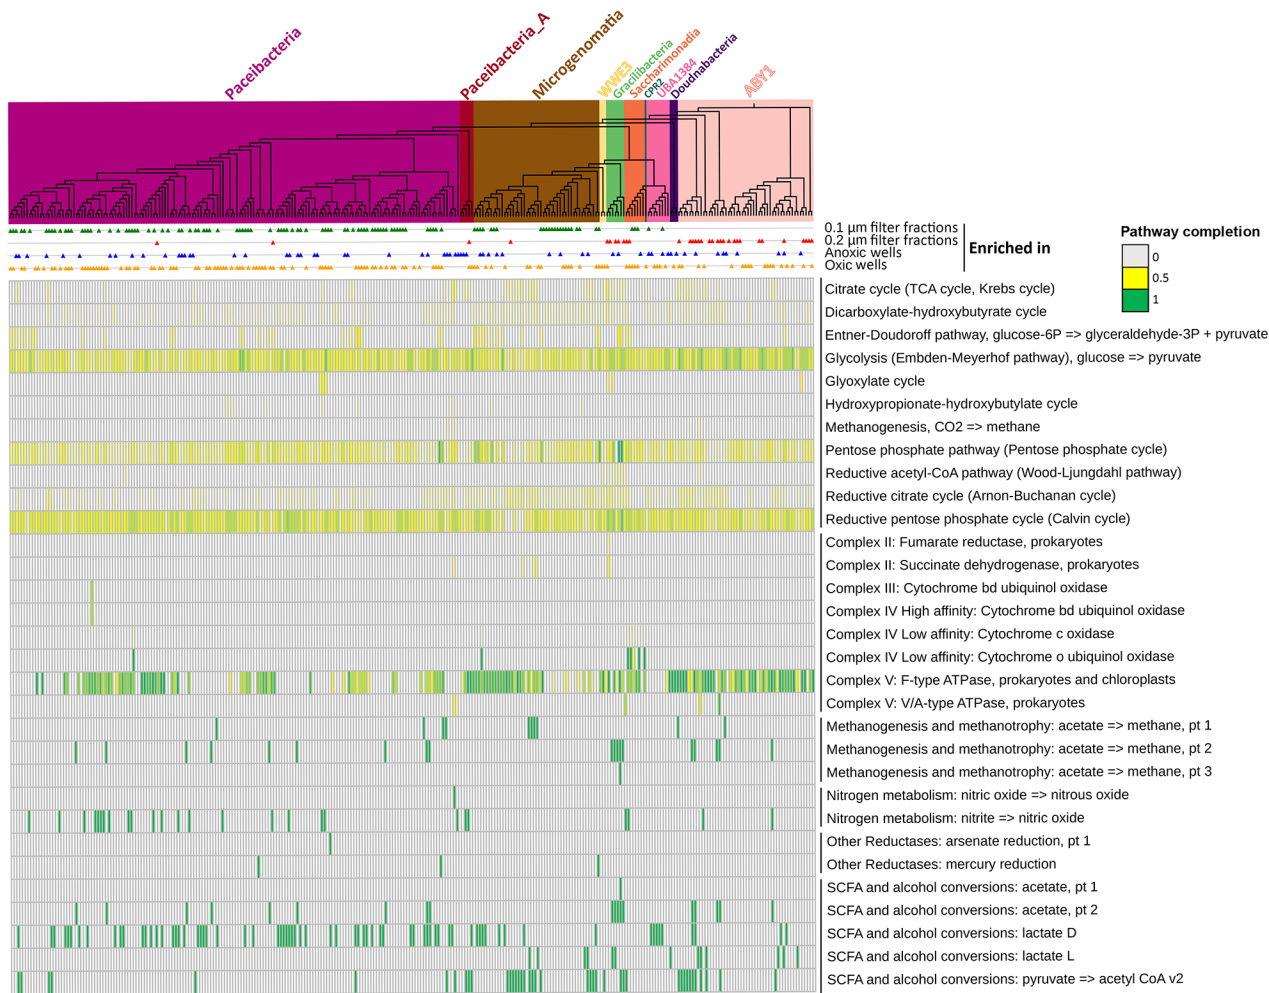

Figure 7

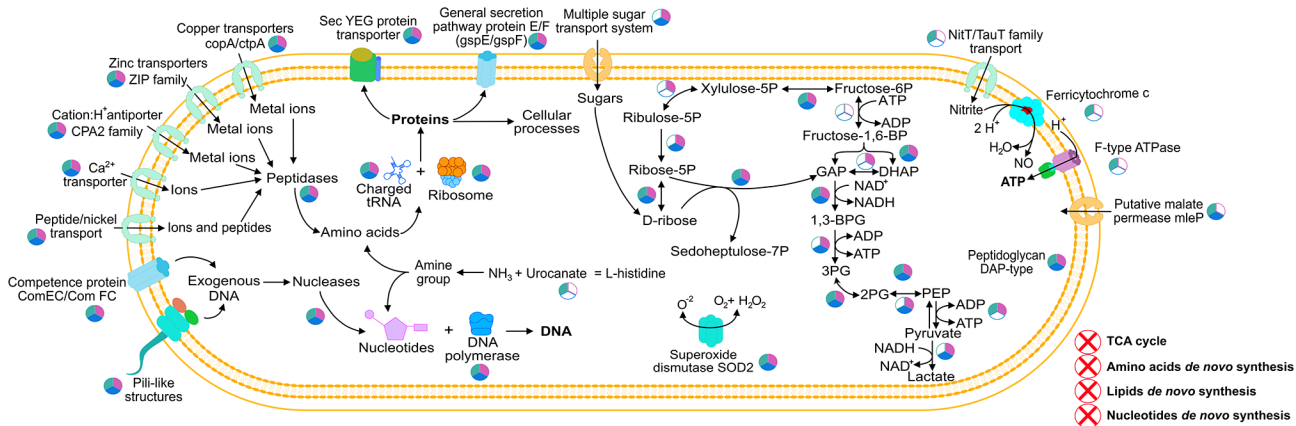

0.10

0.24

0.29

0.26

0.55

| Well | Filter fraction | Average normalized genome coverage | Length (bp) | # of contigs | N50    | GC content | % completion | % redundancy | Order     | Family  | Genus     |
|------|-----------------|------------------------------------|-------------|--------------|--------|------------|--------------|--------------|-----------|---------|-----------|
| H41  | 0.1μm           | 482.45                             | 582,449     | 29           | 36,229 | 38.65      | 56.33        | 0.00         | UBA6257   | UBA9933 | -         |
| H52  | 0.1μm           | 1764.92                            | 502,359     | 21           | 45,086 | 42.87      | 74.65        | 0.00         | UBA6257   | UBA9933 | -         |
| H41  | 0.1μm           | 1080.23                            | 620,744     | 45           | 18,731 | 48.57      | 74.65        | 0.00         | UBA9983_A | UBA2163 | C7867-001 |

Figure 8

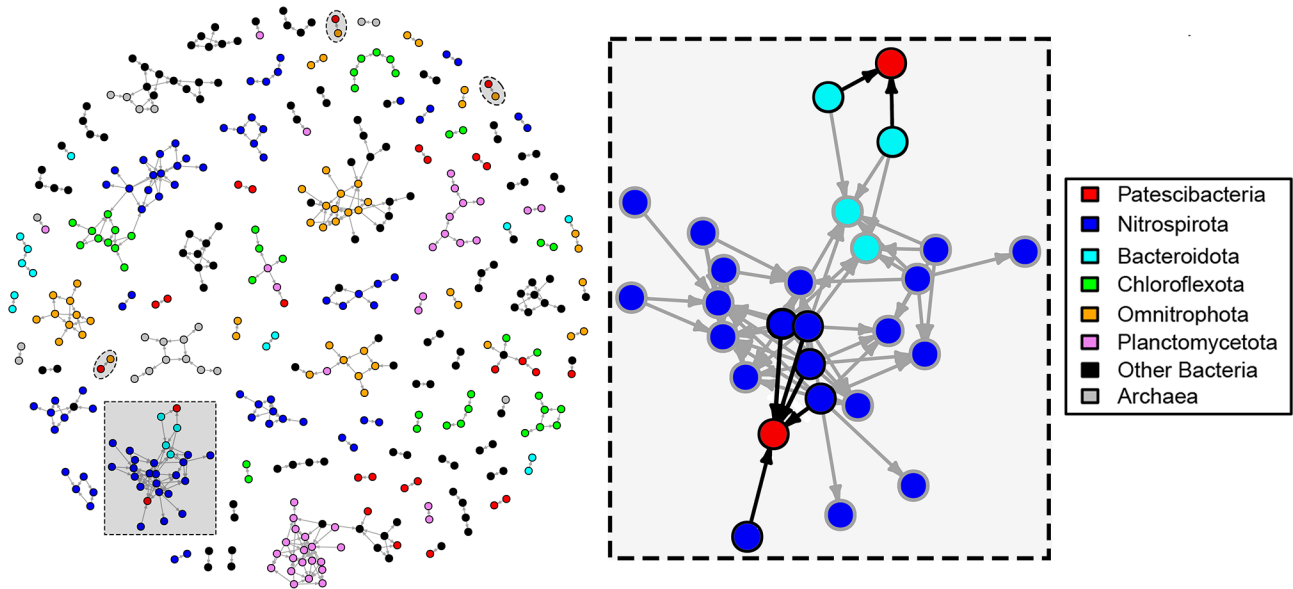

Source: https://www.biorxiv.org/content/10.1101/2021.07.28.454184v1.full.pdf
